1 **A phenotype-based forward genetic screen identifies *Dnajb6* as a sick sinus**  
2 **syndrome gene**

3

4 Yonghe Ding<sup>1,2</sup>, Di Lang<sup>3</sup>, Jianhua Yan<sup>1,4</sup>, Haisong Bu<sup>1,5</sup>, Hongsong Li<sup>1,6</sup>, Kunli Jiao<sup>1,4</sup>,  
5 Jingchun Yang<sup>1</sup>, Tai Le<sup>7</sup>, Karl J. Clark<sup>8</sup>, Stephen C. Ekker<sup>8</sup>, Hung Cao<sup>7,9</sup>, Yuji Zhang<sup>10</sup>,  
6 Yigang Li<sup>4</sup>, Alexey V. Glukhov<sup>3</sup>, Xiaolei Xu<sup>1\*</sup>

7

8 <sup>1</sup>Department of Biochemistry and Molecular Biology, Department of Cardiovascular  
9 Medicine, Mayo Clinic, Rochester, MN, USA; <sup>2</sup>The Affiliated Hospital of Qingdao University &  
10 The Biomedical Sciences Institute of Qingdao University (Qingdao Branch of SJTU Bio-X  
11 Institutes), Qingdao University, Qingdao, China; <sup>3</sup>Department of Medicine, School of  
12 Medicine and Public Health, University of Wisconsin-Madison, Madison, WI, USA; <sup>4</sup>Division  
13 of Cardiology, Xinhua Hospital Affiliated to Shanghai Jiaotong University School Of  
14 Medicine, Shanghai, China; <sup>5</sup>Department of Cardiothoracic Surgery, Xiangya Hospital,  
15 Central South University, Changsha, China; <sup>6</sup>Department of Cardiovascular Medicine,  
16 Jiading District Central Hospital Affiliated Shanghai University of Medicine & Health Science,  
17 Shanghai, China; <sup>7</sup>Department of Electrical Engineering and Computer Science, University  
18 of California Irvine, Irvine, CA, USA; <sup>8</sup>Department of Biochemistry and Molecular Biology,  
19 Mayo Clinic, Rochester, MN, USA; <sup>9</sup>Department of Biomedical Engineering, University of  
20 California Irvine, Irvine, CA, USA; <sup>10</sup>Department of Epidemiology and Public Health,  
21 University of Maryland School of Medicine, Baltimore, Maryland, USA.

22

23 **\* For correspondence:**

24

25 Xiaolei Xu, PhD, Professor of Biochemistry and Molecular Biology, Department of  
26 Biochemistry and Molecular Biology, Department of Cardiovascular Medicine, Mayo Clinic  
27 College of Medicine, Rochester, MN 55905. E-mail: [xu.xiaolei@mayo.edu](mailto:xu.xiaolei@mayo.edu)

28

29 **Running title:** Sick sinus syndrome associated genes identification

30 **Key words:** Sinus arrest; Sick sinus syndrome; *Dnajb6*; Electrocardiogram; Zebrafish.

31

32 **Abstract**

33 Sick sinus syndrome (SSS) is a group of heart rhythm disorders caused by malfunction of  
34 the sinus node, the heart's primary pacemaker. Partially owing to its aging-associated  
35 phenotypic manifestation and low expressivity, molecular mechanisms of SSS remain  
36 difficult to decipher. Here, we aim to develop a phenotype-based forward genetic approach  
37 in the zebrafish (*Danio rerio*) animal model for discovering essential genes which dysfunction  
38 could result in SSS-like phenotypes. Previously we showed the generation of protein trap  
39 library by using a revertible gene-breaking transposon (GBT)-based insertional mutagenesis  
40 system. Here, we reported the generation of a collection of 35 zebrafish insertional cardiac  
41 lines derived from this protein trap library, which was screened using electrocardiographic  
42 measurements. As a result, three mutants with SSS-like phenotypes were identified. We  
43 then focused on one of these 3 GBT mutants called *GBT411* in which *dnajb6b* gene was  
44 disrupted, and conducted expressional, genetic, transcriptome, and electrophysiological  
45 studies using both zebrafish and mouse models. These studies confirmed the identity of  
46 *Dnajb6* as a novel SSS causative gene with a unique expression pattern within the  
47 specialized population of sinus node pacemaker cardiomyocytes that lack the expression of  
48 HCN4 channels. Together, this study demonstrates the feasibility of a genetic screening  
49 approach in an adult vertebrate animal model for discovering new genetic factors for a heart  
50 rhythm disorder such as SSS.

51 **1. Introduction**

52 Cardiac arrhythmia affects >2% of individuals in community-dwelling adults.<sup>1</sup> Sick sinus  
53 syndrome (SSS), also known as sinus node dysfunction or sinoatrial node (SAN) disease, is  
54 a group of heart rhythm disorders affecting cardiac impulse formation and/or propagation  
55 from the SAN, the heart's primary pacemaker. SSS manifests a spectrum of presentations  
56 such as sinus pause or arrest (SA), bradycardia, sinoatrial exit block, or tachy-brady  
57 syndrome accompanied by atrial fibrillation (AF).<sup>2, 3</sup> In addition, 20% to 60% SSS patients  
58 show abnormal response to autonomic stresses.<sup>4</sup> SSS occurs most commonly in elderly,  
59 with an estimated prevalence of 1 case per 600 adults over age 65. Symptomatic SSS can  
60 lead to inadequate blood supply to the heart and body and contribute significantly to life-  
61 threatening problems such as heart failure and cardiac arrest. While SSS is the most  
62 common indication for pacemaker implantation worldwide,<sup>5</sup> the mechanisms of SSS remain  
63 poorly understood, making it difficult to stratify SSS risk in vulnerable cohorts of patients and  
64 development of effective pharmacologic therapy for pacemaker abnormalities.

65 To develop mechanism-based diagnostic and therapeutic strategies for SSS, it is desirable  
66 to discover genes that are expressed in the SAN and may contribute to SSS. Unfortunately,  
67 very limited number of SSS genes and related animal models are currently available. While  
68 mutations in the cardiac sodium channel  $\alpha$ -subunit encoding gene (*SCN5A*)<sup>6, 7</sup> and  
69 hyperpolarization-activated cyclic nucleotide-gated channel encoding gene (*HCN4*)<sup>8, 9</sup> have  
70 been found to cause SSS, only a few other genes affecting the structure and/or function of  
71 the SAN were identified to increase the risk of developing SSS.<sup>10, 11</sup> Classic human genetic

72 linkage analysis-based approach has played important roles in gene discovery, but it is  
73 largely limited by the availability of suitable pedigree, especially in this age-dependent  
74 disease.<sup>12</sup> More recently, the genome-wide association studies (GWASs) have been used to  
75 identify novel genetic susceptibility factors associated with SSS.<sup>11, 13</sup> However, owing to its  
76 statistic and associative nature, it has been difficult to confidently establish genotype-  
77 phenotype relationships for the vast amount of variants.<sup>14, 15</sup> Alternative approaches for  
78 effective identification of essential genes for SSS are thus needed.

79       Phenotype-based forward genetic screen in model organisms is a powerful strategy for  
80 deciphering genetic basis of a biological process. Without any *a priori* assumption, new  
81 genes can be identified that shed light on key signaling pathways. However, this approach is  
82 difficult to carry out in adult vertebrates, because of significantly increased burden of colony  
83 management efforts.<sup>16, 17</sup> To address this bottleneck, zebrafish, a vertebrate with higher  
84 throughput than rodents, has been explored to study cardiac diseases.<sup>18</sup> Despite its small  
85 body size, a zebrafish heart has conserved myocardium, endocardium, and epicardium as  
86 found in human, and adult zebrafish shows strikingly similar cardiac physiology to humans.<sup>19</sup>  
87 Its heart rate is around 100 beats per minute (bpm), which is much comparable to that in  
88 human than in rodents. Adult zebrafish models for human cardiac diseases such as  
89 cardiomyopathies have been successfully generated.<sup>20</sup> Besides *N*-ethyl-*N*-nitrosourea  
90 (ENU)-based mutagenesis screens that have been conducted to identify embryonic  
91 recessive mutants, insertional mutagens such as those based on viruses and/or transposons  
92 have been developed to further increase the throughput of the screen, opening doors to

93 screening genes affecting adult phenotypes.<sup>21, 22</sup> Our team recently reported a gene-  
94 breaking transposon (GBT)-based gene-trap system in zebrafish which enables to disrupt  
95 gene function reversibly at high efficiency (>99% at the RNA level).<sup>23</sup> Approximately 1,200  
96 GBT lines have been generated, laying a foundation for adult phenotype-based forward  
97 genetic screens.<sup>24</sup> Because the expression pattern of the affected genes in each GBT line is  
98 reported by a fluorescence reporter, we enriched GBT lines with cardiac expression and  
99 generated a zebrafish insertional cardiac (ZIC) mutant collection.<sup>25</sup> Through stressing the  
100 ZIC collection with doxorubicin, an anti-cancer drug, we demonstrated that novel genetic  
101 factors of doxorubicin-induced cardiomyopathy (DIC), such as Dnaj (Hsp40) homology,  
102 subfamily B, member 6b (*dnajb6b*), sorbin and SH3 domain-containing 2b (*sorbs2b*) and  
103 retinoid x receptor alpha a (*rxraa*), could be successfully identified.<sup>26-28</sup> Follow up studies on  
104 these hits confirmed their identity as important cardiomyopathy genes.

105 Encouraged by our success in identifying new genetic factors for DIC, we reasoned that  
106 genes for rhythm disorders could be similarly identified by directly screening adult ZIC lines  
107 using echocardiographic measurement. We had recently optimized a commercially available  
108 ECG system to define SA episodes in an adult zebrafish, and the baseline frequency of  
109 aging-associated SSS in wild-type (WT) adult zebrafish.<sup>29</sup> Here, we reported a pilot screen of  
110 our ZIC collection using this ECG platform and the resultant discovery of 3 positive hits,  
111 followed by comprehensive expressional and functional analysis of *dnajb6b* gene that is  
112 linked to one of the hits. Together, our data prove the feasibility of a phenotype-based  
113 screening strategy in adult zebrafish for discovering new rhythm genes.

## 114 **2. Results**

### 115 **2.1 Identification of 35 zebrafish insertional cardiac (ZIC) mutants**

116 We recently reported the generation of more than 1,200 zebrafish mutant strains using the  
117 gene-break transposon (GBT) vector.<sup>24</sup> The tagged gene in each GBT mutant is typically  
118 disrupted with 99% knockdown efficiency and its expression pattern is reported by a  
119 monomeric red fluorescent protein (mRFP) reporter.<sup>24</sup> We screened 609 GBT lines based on  
120 their mRFP expression and identified 44 mutants with either the embryonic or adult heart  
121 expression.<sup>26</sup> Then, we outcrossed these 44 lines, aided by Southern blotting to identify  
122 offsprings with a lower copy number of insertions,<sup>25</sup> and identified 35 mutants with a single  
123 copy of the GBT insertion after 2-4 generations of outcross (Table 1).<sup>26</sup> Using a combination  
124 of inverse PCR and/or 5'- and 3'-RACE PCR cloning approaches, we mapped the genetic  
125 loci of GBT inserts in these 35 mutants (Table 1).<sup>25</sup> A majority of the affected genes have  
126 human orthologs with a corresponding Online Mendelian Inheritance in Man (OMIM)  
127 number. Because each GBT line contains a single GBT insertion that traps a gene with  
128 cardiac expression, these 35 GBT lines were termed as zebrafish insertional cardiac (ZIC)  
129 mutants.

### 130 **2.2 An ECG screen of 35 ZIC lines identified 3 mutants with increased incidence of SA** 131 **and/or AV block episodes**

132 Because each ZIC mutant disrupts a gene with cardiac expression, we enquired whether an  
133 ECG screening can be conducted to identify genetic lesions that result in arrhythmia. Since  
134 aging is a strong risk factor for heart rhythm disorders, we carried our screen in fish aged

135 from 1.5 to 2 years old to facilitate the manifestation of cardiac rhythm abnormalities.  
136 Because these fish are offsprings of incrosses and have been preselected based on the  
137 RFP tag, their genotype consists of both heterozygous and homozygous for the affected  
138 genes. In WT fish aged around 2 years old, we noted baseline SA episodes in about 1 out  
139 of 20 fish (5%) fish.<sup>29</sup> By contrast, among the 35 ZIC lines, we noted a significantly increased  
140 incidence of SA in 3 lines, including 3 out of 13 *GBT103* fish at 1.5 years old, 4 out of 10  
141 *GBT410* fish at 2 years old, and 3 out of 8 *GBT411* fish at 2 years old (Figure 1A). In  
142 addition to SA, we also noted incidence of atrioventricular block (AVB) in 4 out of 13 *GBT103*  
143 fish at 1.5 years of age. Because the increased incidence of SA and/or AVB is hallmark of  
144 SSS, these 3 lines were thus identified as 3 candidate SSS-like mutants.

145 To confirm the linkage between genetic lesions and the SSS-like phenotypes, we  
146 incrossed these 3 ZIC mutants to obtain homozygous animals. This is possible because the  
147 precise insertional positions for all the 35 ZIC lines have been mapped (Table 1, Figure 1B).  
148 We carried genotyping PCR to identify homozygous mutants for the 3 candidate ZIC lines  
149 using genomic DNA isolated from their tail fins, raised up homozygous fish to 16 months,  
150 and carried out ECG assays at room temperature (25 °C). In contrast to 5% WT fish  
151 whereby SA episodes can be detected, significantly increased SA incidence was noted in all  
152 3 homozygous mutants, with an incidence of 57.1% in the *GBT103/cyth3a*, 44.4% in the  
153 *GBT410/vapal*, and 40% in the *GBT411/dnajb6b* mutant, respectively (Table 2). We also  
154 noted a reduced heart rate, another SSS phenotypic trait in the *GBT411*<sup>-/-</sup> homozygous, but  
155 not the other two GBT homozygous mutants (Table 2).

156 To seek additional evidence supporting our screening strategy, we decided to focus on  
157 the *GBT411/dnajb6b* mutant that is the most arrhythmogenic – this mutant is also  
158 characterized with reduced heart rate phenotype. Because arrhythmic mutants often  
159 manifest an aberrant response to extrinsic regulation of the heart rate, we examined  
160 responses of the *GBT411/dnajb6b* homozygous mutants (*GBT411<sup>-/-</sup>*) to autonomic stimuli by  
161 stressing them with 3 compounds, including isoproterenol, a  $\beta$ -adrenoreceptor agonist for  
162 sympathetic nervous system; atropine, an anticholinergic inhibitor; and carbachol, a  
163 cholinergic agonist for parasympathetic nervous system. After administrating these drugs to  
164 the *GBT411<sup>-/-</sup>* fish at 1 year old via intraperitoneal (IP) injection, we noted aberrant heart rate  
165 response to both atropine and carbachol, while its response to isoproterenol remained  
166 unchanged (Supplemental Figure 1). Next, we stressed the *GBT411<sup>-/-</sup>* fish with verapamil, an  
167 L-type  $\text{Ca}^{2+}$  channel antagonists, to stress out cardiac pacemaking and unmask SSS  
168 phenotype. Indeed, SA incidence was significantly increased in the *GBT411<sup>-/-</sup>* fish at 10  
169 months of age (Supplemental Table 1). Similarly, the heart rate was significantly reduced in  
170 the *GBT411<sup>-/-</sup>* fish compared to WT controls. Together, these data provided additional  
171 evidence to support *GBT411/dnajb6b* as an arrhythmia mutant.

### 172 **2.3 Dnajb6 expression is enriched in the SAN tissue, manifesting a unique expression** 173 **pattern**

174 *Dnajb6* was previously identified as a cardiomyopathy-associated gene,<sup>26</sup> raising concerns  
175 on whether the arrhythmic phenotype in the *GBT411/dnajb6b* mutant is a primary defect in  
176 the cardiac conduction system or a consequence of cardiac remodeling in cardiomyocytes.



177 To address this further, we firstly defined the expression of the Dnajb6 protein in the heart.  
178 Our previous characterization of the mRFP reporter in the *GBT411/dnajb6b* fish revealed  
179 expression of Dnajb6b protein in both the embryonic and the adult hearts.<sup>25, 26</sup> To enquire its  
180 expression in the cardiac conduction system (CCS), we crossed the *GBT411/dnajb6b* line  
181 into the sqET33-mi59B transgenic line in which EGFP labels the zebrafish SAN and atrio-  
182 ventricular canal (AVC) cells.<sup>30</sup> Co-localization analysis demonstrated that the mRFP  
183 positive, Dnajb6b-expressing cells partially overlap with the EGFP signal labeling SAN cells  
184 at the base of atrium in the embryonic heart at 3 days post-fertilization and also AVC in adult  
185 heart tissues (Figure 2A and 2B). It should be noted that the Dnajb6b-mRFP-positive  
186 expression patterns overlap with but extend beyond the sqET33-mi59B EGFP-positive  
187 expression patterns in both embryonic and adult fish hearts (Figure 2A and 2B).

188 To seek additional evidence supporting expression and function of Dnajb6 in the CCS,  
189 we turned to the mouse model, and noted Dnajb6 protein expression in all 4 cardiac  
190 chambers in a sectioned mouse heart tissue (Supplemental Figure 2). Interestingly, we  
191 found a highly enriched expression of Dnajb6 specifically in the SAN region, as indicated by  
192 its localization in the region with expression of HCN4 channel which are responsible for the  
193 generation of hyperpolarization-activated pacemaker “funny” current in pacemaker cells  
194 (Figure 2C). However, at higher magnification images, only a small proportion of Dnajb6-  
195 positive cells showed colocalization with the HCN4-positive cells (arrows for colocalized cells  
196 vs. arrowheads non-colocalized cells in Figure 2D). In addition, we noted co-localization of  
197 Dnajb6 with Tbx3 and Islet1, two transcription factors that specify the formation of the SAN

198 cells.<sup>32</sup> Interestingly, we found a negative correlation between *Dnajib6* and *Tbx3* expression  
199 levels: cells with strong *Dnajib6* expression tend to overlap with cells that show weak *Tbx3*  
200 signal, while cells with weak *Dnajib6* expression tend to overlap with the cells with strong  
201 *Tbx3* signal. In contrast, the *Dnajib6* expressing cells largely overlap with the *Islet1* positive  
202 cells. In summary, the enriched expression of *Dnajib6* in the SAN region may indicate that  
203 *Dnajib6* could contribute to SSS development; however, its unique expression patterns  
204 underscored heterogeneity of pacemaker cells within the SAN.<sup>33, 34</sup>

#### 205 **2.4 The *Dnajib6*<sup>+/-</sup> mice manifest features of SSS when there is no sign of** 206 **cardiomyopathy**

207 To test the conservation of the cardiac arrhythmic functions of *dnajib6* suggested from  
208 zebrafish, we obtained a global *Dnajib6* knock out (KO) mouse line. The mutant harbors a  
209 deletion of 36,843 bp nucleotides spanning from the first intron to the last intron of *Dnajib6*  
210 gene located in the Chromosome 5, which was created by the insertion of the Velocigene  
211 ZEN-Ub1 cassette and subsequent LoxP excision using Cre (Figure 3A). Genotyping PCR  
212 using a combination of the *Dnajib6* gene-specific and the Zen-Ubi cassette-specific primers  
213 was carried out to identify both *Dnajib6* heterozygous (*Dnajib6*<sup>+/-</sup>) and homozygous (*Dnajib6*<sup>-/-</sup>)  
214 KO mice (Figure 3B). At the protein level, both the *Dnajib6* short (S) and long (L) isoforms  
215 were reduced by ~ 50% in *Dnajib6*<sup>+/-</sup> mouse hearts (Figure 3C), and near completely  
216 depleted in *Dnajib6*<sup>-/-</sup> mutant hearts. Consistent with a previous report,<sup>35</sup> *Dnajib6*<sup>-/-</sup> KO mice  
217 were embryonic lethal, likely due to the placental defects (data not shown). The *Dnajib6*<sup>+/-</sup>  
218 mice were able to grow to adulthood without visually noticeable phenotypes until at least 1

219 year of age. Cardiac mechanical function remained normal, as indicated by indistinguishable  
220 cardiac echocardiography indices from those of WT siblings at the same age (Table 3).  
221 However, significantly increased frequency of SA and AVB episodes, as well as bradycardia  
222 phenotype, were noted in the *Dnajb6*<sup>+/-</sup> mice at 6 months old (Figure 3D and 3E, and Table  
223 4). Similar to the *GBT411/dnajb6b* mutant in zebrafish, *Dnajb6*<sup>+/-</sup> mice exhibited an impaired  
224 response to autonomic stimuli including isoproterenol and carbachol (Figure 3E). Together,  
225 these studies suggest that *Dnajb6*<sup>+/-</sup> mice manifest SSS phenotype without  
226 structural/functional remodeling of the heart.

## 227 **2.5 Ex vivo evidences of SAN dysfunction in the *Dnajb6*<sup>+/-</sup> mice**

228 To prove SAN dysfunction in *Dnajb6*<sup>+/-</sup> mice, we performed electrophysiological assessment  
229 of SAN pacemaker function by high-resolution fluorescent optical mapping of action  
230 potentials from isolated mouse atria at 1 year of age. We firstly analyzed the distribution of  
231 the leading pacemaker location site in *Dnajb6*<sup>+/-</sup> mice compared to WT control. In WT mice,  
232 leading pacemakers were mostly located within the anatomically and functionally defined  
233 SAN region (Figure 4A and 4B).<sup>18, 36-38</sup> In contrast, significant increase in the number of  
234 leading pacemakers located outside of the SAN, including the subsidiary atrial pacemakers  
235 and inter-atrial septum pacemakers, was observed in *Dnajb6*<sup>+/-</sup> mice. In addition, in *Dnajb6*<sup>+/-</sup>  
236 mice, we also found a highly irregular heart rate, accompanied by the presence of multiple  
237 competing pacemakers and a beat-to-beat migration of the leading pacemaker between  
238 various sites which included SAN, right atrial ectopic (subsidiary) pacemakers, and inter-  
239 atrial septum (Figure 4C and 4D). Similar to the results from the *in vivo* studies, bradycardia

240 phenotype was consistently detected in the isolated atrial preparations as well (Figure 4E).  
241 Optical mapping on isolated atrial preparations further revealed different responses of heart  
242 rate during isoproterenol, atropine, and carbachol stimulations in *Dnajb6*<sup>+/-</sup> mice. Significantly  
243 increased cycle length (CL) variations were also observed at baseline and upon carbachol  
244 stimulation (Figure 4F).

245 Importantly, in *Dnajb6*<sup>+/-</sup> mice, we found significant prolongation of the SAN recovery  
246 time corrected to beating rate (cSANRT) measured both at baseline and under autonomic  
247 stresses, including stimulation by isoproterenol, carbachol, and atropine (Figure 5),  
248 confirming the presence of SAN dysfunction in *Dnajb6*<sup>+/-</sup> mice. Optical mapping also showed  
249 that, unlike WT, the first spontaneous post-pacing atrial beats during SANRT measurements  
250 in *Dnajb6*<sup>+/-</sup> mice were originated from ectopic locations outside of the SAN (Figure 5A-B),  
251 further supporting a suppressed SAN function.

## 252 **2.6 Transcriptome analysis of the *Dnajb6*<sup>+/-</sup> mutant hearts identifies altered genes** 253 **encoding ion channels and proteins in the Wnt/beta-catenin pathway**

254 To seek molecular mechanisms underlying the SSS phenotypes observed in *Dnajb6*<sup>+/-</sup> mice,  
255 we performed whole transcriptome RNA-sequencing experiments using right atrial tissues  
256 isolated from *Dnajb6*<sup>+/-</sup> and WT mice at 1 year of age. Transcriptomes of biological replicates  
257 for *Dnajb6*<sup>+/-</sup> mice did form a cluster that differs from the cluster for WT control samples, as  
258 indicated by principal component analysis (PCA) (Supplemental Figure 3A). Based on a cut-  
259 off of adjusted *P* value < 0.05, 107 differentially expressed (DE) genes were identified, among  
260 which 37 genes were upregulated and 70 genes were downregulated in the *Dnajb6*<sup>+/-</sup>

261 mutants compared with WT controls (Supplemental Figure 3B and 3C). Through Ingenuity  
262 pathway analysis (IPA), several diverse signaling pathways were identified to be altered in  
263 the *Dnajb6*<sup>+/-</sup> mice (Supplemental Figure 3D). Among these 107 differentially expressed  
264 genes, we noted calcium handling related protein-encoding genes like *Slc24a2* and *Cdh20*,  
265 ion channel-encoding genes including *Slc9a3r1*, *Kcnh7*, *Fxyd5* and *Gjb5* (Figure 6A), as well  
266 as 4 Wnt pathway related genes (Figure 6B). We then performed quantitative RT-PCR  
267 analysis and experimentally confirmed dysregulation of these genes in the *Dnajb6*<sup>+/-</sup> mice  
268 (Figure 6C). The data on calcium handling and ion channel-encoding genes are in line with  
269 the SAN dysfunction phenotype observed in the *Dnajb6*<sup>+/-</sup> mice. Because Wnt signaling has  
270 been shown to direct pacemaker cell specification during SAN morphogenesis,<sup>39, 40</sup> the  
271 identification of 4 Wnt pathway related genes could also support the observed SAN  
272 dysfunction phenotype in the *Dnajb6*<sup>+/-</sup> mice.

273 **3. Discussion**

274 **3.1 GBT lines enable a phenotype-based screening approach for discovering new SSS**  
275 **genes**

276 This work is based on recent establishment of a GBT protein trap-based insertional  
277 mutagenesis screening strategy and the generation of a collection of 1,200 zebrafish mutant  
278 strains.<sup>24</sup> Here, we demonstrated the feasibility of screening these GBT lines for discovering  
279 new genetic factors for SSS, an aging-associated human disease. To overcome the  
280 challenge of colony management efforts that is associated with an adult screen, we  
281 leveraged the following unique advantages of the GBT vectors and zebrafish models. First,  
282 the knockdown efficiency for the tagged gene in each GBT homozygous mutant is  
283 consistently high, which is typically >99%, which ensued the success of an adult screen.  
284 Second, because of a fluorescence tag, heterozygous GBT fish can be easily identified  
285 under a fluorescent microscope without the need of genotyping. As a consequence, a  
286 cardiac expression-based enrichment strategy can be used to identify ZIC lines. Instead of  
287 screening 609 GBT lines, only 35 ZIC lines need to be screened, which significantly reduced  
288 the workload. We acknowledge that some genes with extremely weak cardiac expression  
289 might be missed; however, this is not a concern during the early phase of a genome-wide  
290 screen. Third, it is economically feasible to house hundreds of mutant fish lines with different  
291 genetic lesions to 1-3 years old. Finally, we optimized an ECG technology, defined the  
292 baseline SSS in WT fish, and implemented heat-stress to zebrafish at old ages, which shall  
293 increase the SSS phenotypic expressivity.

294 While the forward genetic screening approach has been successfully utilized to pinpoint  
295 genetic basis of cardiogenesis in embryonic fish and doxorubicin-induced cardiomyopathy  
296 (DIC) in adult zebrafish,<sup>21, 26</sup> this study extended this powerful genetic approach to adult  
297 zebrafish for discovering genetic factors associated with rhythm disorders. Given very little  
298 knowledge of molecular underpinnings of SSS, the development of this novel approach is  
299 significant. Human genetics approach has been difficult, partially owing to the aging  
300 associated nature - SSS-like phenotypes at its early stage are often missed, because SA  
301 episodes cannot be detected if the ECG measurement only covers a short time window. It  
302 takes years in patients to develop from asymptotic to onset of SSS symptoms. Moreover,  
303 human genetic studies of SSS are typically confounded by complicated environmental  
304 factors, which are minimized in our zebrafish forward genetic approach - each ZIC mutant  
305 is maintained in a well-controlled living environment, and the only difference among different  
306 ZIC lines is a single genetic deficiency.

### 307 **3.2 *Dnajb6* is a new SSS gene with a unique expression in SAN**

308 The human *DNAJB6* gene encodes a molecular chaperone protein of the heat shock protein  
309 40 (Hsp40) family. *Dnajb6* has been previously linked to neurodegenerative diseases via its  
310 function in protein folding and the clearance of polyglutamine stretches (polyQ),<sup>41, 42</sup> and to  
311 muscular dystrophy via its protein-protein interaction with Bag3 in the sarcomere.<sup>43</sup> Our  
312 previous forward genetic screen in adult zebrafish identified *GBT411/dnajb6b* as a  
313 deleterious modifier for DIC.<sup>26</sup> Here, we provided several evidences in both fish and mouse  
314 models, suggesting new functions of *Dnajb6* as a genetic factor for arrhythmia/SSS. First,

315 *GBT411/dnajb6b* is one of three ZIC lines with SSS-like phenotypes that were identified from  
316 a screen of 607 GBT lines that is independent of the previous DIC screen. Second, in  
317 zebrafish, the increased incidence of SA episodes and reduced heart rate, two main features  
318 of SSS, were detected in 10 monthold *GBT411/dnajb6b* homozygous fish, when structural  
319 remodeling/cardiac dysfunction have not yet occurred.<sup>25</sup> Similarly, bradycardia and SA  
320 episodes were noted in *Dnajb6<sup>+/-</sup>* heterozygous KO mice at 6 months old, when the  
321 echocardiography indices remained indistinguishable from their age-matched siblings. Third,  
322 consistent with loss-of-function studies, *Dnajb6* expression was detected in the SAN of both  
323 zebrafish and mice. Importantly, *Dnajb6* is highly enriched in the SAN region of the mouse  
324 comparing to the surrounding atrial tissue. Fourth, transcriptome analysis of *Dnajb6<sup>+/-</sup>* mice  
325 uncovered altered expression of genes involved in calcium handling, ion channels, and Wnt  
326 signaling pathway, which have been linked to the formation/function of the SAN. Together,  
327 we conclude that SSS might not be a consequence of *Dnajb6* cardiomyopathy. Instead, the  
328 irregular heartbeat is most likely a direct consequence of *Dnajb6* depletion in pacemaker  
329 cells, subsequently contributing to the pathogenesis of cardiomyopathy that occurs later. To  
330 ultimately confirm this hypothesis and to discern functions of *Dnajb6* in SAN pacemakers  
331 from working cardiomyocytes, a tissue-specific KO line for *Dnajb6* needs to be generated  
332 and studied.

333 Detailed examination of *Dnajb6* expression in the SAN uncovered unique expression  
334 patterns. While *Dnajb6* is highly expressed in the SAN and overlaps with one of the main  
335 SAN progenitors ISL1 (Figure 2C and 2F), we found a poor co-expression with one of the



336 main pacemaker protein HCN4: Dnajb6-positive cells overlap only with a small portion of the  
337 HCN4-positive cells (Figure 2C and 2D). This is supported by a negative correlation between  
338 the expression level of Dnajb6 and Tbx3, as Tbx3 is one of the main transcriptional  
339 regulators of HCN4 expression in cardiac conduction system.<sup>44, 45</sup> While these results may  
340 sound surprising, studies on isolated SAN cells reported dramatic variability in the density of  
341 HCN-formed “funny” current  $I_f$ .<sup>46-49</sup> In spontaneously beating cardiomyocytes isolated from  
342 the rabbit SAN, Monfredi et al. showed that  $I_f$  density can range from 0 to ~50 pA/pF and  
343 some the spontaneously beating SAN cells may have little to zero  $I_f$ .<sup>48</sup> The authors further  
344 observed SAN cells with lower  $I_f$  current densities demonstrated a significantly greater  
345 sensitivity to inhibition of  $Ca^{2+}$  clock component of the SAN pacemaking machinery by  
346 cyclopiazonic acid, a moderate disruptor of  $Ca^{2+}$  cycling, in terms of beating rate slowing.  
347 The authors also noted that a relatively large cell population (21 of 90 cells) stopped beating  
348 when the sarcoplasmic reticulum pumping rate decreased in the presence of CPA, despite a  
349 relatively high  $I_f$  density. Together with other studies,<sup>33, 50</sup> these results may indicate a  
350 significant functional heterogeneity of pacemaker cells within the SAN in terms of their  
351 spontaneous beating rate, ion channel and calcium handling protein expression repertoire,  
352 and molecular mechanisms of their pacemaker activities. The latter was recently linked to  
353 the balance between the voltage and calcium components of the coupled-clock pacemaker  
354 system describing mechanisms of SAN automaticity.<sup>51</sup> As summarized in details in our  
355 recent review,<sup>52</sup> it was suggested that pacemaker cells, which primary rely on the  $Ca^{2+}$  clock,  
356 are more sensitive to the autonomic modulation through cAMP-mediated regulation of

357 phosphorylation of Ca<sup>2+</sup> handling proteins.<sup>50</sup> This is in line with our findings indicating that  
358 *Dnajb6* is mainly expressed in SAN cells with low HCN4 density (Figure 2D) and that *Dnajb6*  
359 knock-out affects calcium homeostasis genes (Figure 6) and leads to abnormal autonomic  
360 regulation of the SAN (Figure 3E and Figure 4). Though our studies strongly support a  
361 crucial role of *Dnajb6* in SAN automaticity and autonomic regulation of SAN pacemaking,  
362 detailed studies are needed to determine exact cellular and molecular pathways involved in  
363 these mechanisms.

### 364 **3.3 A phenotype-based screening approach would facilitate the elucidation of** 365 **molecular basis of SSS**

366 Besides *dnajb6b*, our pilot forward genetic screen also suggested two additional candidate  
367 SSS genes like *cyth3a* and *vapa1*, pending more experimental evidence to confirm their  
368 function. This forward genetic screening approach is scalable to the genome, which would  
369 generate a comprehensive list of candidate genes for SSS. Because there are at least 3  
370 major cell types in the SAN region, including pacemaker cells in SAN that generate rhythm,  
371 paranodal areas and transition cells in the atrium that transmit the signal from pacemaker  
372 cells to govern coordinated contraction of the heart from atrium and then to the ventricle,<sup>53, 54</sup>  
373 newly identified SSS genes could be categorized into different groups based on their  
374 expression pattern and phenotypic traits. We anticipate that systematic studies of these  
375 candidate genes identified from zebrafish will significantly advance our understanding of  
376 pathophysiology of SSS.

## 377 **4. Materials and methods**

### 378 **4.1 Animals**

379 All experiments were conducted in accordance with the National Institutes of Health Guide  
380 for the Care and Use of Laboratory Animals (NIH Pub. No. 80-23). All methods and protocols  
381 used in these studies have been approved by the Mayo Clinic Institutional Animal Care and  
382 Use Committee and by the Animal Care and Use Committee of University of Wisconsin-  
383 Madison, following the Guidelines for the Care and Use of Laboratory Animals published by  
384 the US National Institutes of Health (publication No. 85-23, revised 1996). The zebrafish  
385 (*Danio rerio*) WIK line was maintained under a 14-hour light/10-hour dark cycle at 28.5°C. All  
386 GBT lines were generated previously.<sup>23-25</sup> The *Dnaja6* knockout (KO) mice, originally named  
387 *Dnaja6<sup>tm1.1(KOMP)Vlcg</sup>*, were generated from the Jackson Laboratory (Original catalog #018623).  
388 Briefly, the insertion of Velocigene cassette ZEN-Ub1 created a deletion sized 36,843 bp  
389 nucleotides spanning from the first to the last intron of the *Dnaja6* gene at the Chromosome  
390 5 (Genome Build37) of the C57BL/6N mice. The mouse was subsequently bred to a  
391 ubiquitous Cre deletion mouse line for recombination of the LoxP sites that excised the  
392 neomycin selection cassette. The following genotyping PCR primers for the *Dnaja6* mutant  
393 mice were used: mutant primer F2, 5'-AAACTGCGCACTGTACCACC-3' and mutant primer  
394 R2, 5'-CGGTCGCTACCATTACCAGT-3' for detecting the mutant allele (predicted size of  
395 700 bp); and WT primer F1, 5'-TACTCCAGCCCCACTCTTACTC-3' and WT primer R1, 5'-  
396 ACTGCCCATCTTCTTCAACTTC-3' for detecting the WT allele (predicted size of 300 bp).

### 397 **4.2 Enrichment and cloning of 35 ZIC mutants**

398 Zebrafish cardiac insertional (ZIC) mutants were identified and collected based on the mRFP  
399 expression in the embryonic heart from 2 to 4 days post-fertilization (dpf) and/or in the  
400 dissected adult heart at 6 months to 1 year of age. All ZIC lines, each with a single copy of  
401 GBT insertion, were obtained after 2 to 4 generations of outcrosses, guided by Southern  
402 blotting using the *GFP* probe primed to the GBT vector.<sup>25</sup> A combination of 3 different  
403 methods including Inverse PCR, 5'-RACE and/or 3'-RACE were employed to clone the GBT  
404 transposon integration sites accordingly to previously published protocols.<sup>23-25</sup>

#### 405 **4.3 Zebrafish Electrocardiogram (ECG)**

406 Microsurgery was operated under a dissection microscope to remove the silvery epithelial  
407 layer of the hypodermis one week before fish were subjected to the ECG.<sup>29</sup> Fish were initially  
408 acclimated for one hour after transferred from the circulating fish facility to the laboratory  
409 bench, followed by anesthesia in the solution of pH 7.0 adjusted tricaine (MS-222, Sigma) at  
410 the concentration of 0.02% dissolved in E3 medium (containing 5 mM NaCl, 0.17 mM KCl,  
411 0.33 mM CaCl<sub>2</sub>, and 0.33 mM MgSO<sub>4</sub>) for 6 minutes. Two minutes of ECG recording were  
412 then obtained with the ECG recording system, according to the instructions (ZS-200, iWorx  
413 Systems, Inc) and a recently published protocol.<sup>29</sup> Initial ECG screens of ZIC heterozygous  
414 mutants were performed at 32°C using a temperature-controlled chamber set-up, made by  
415 covering the ECG recording system with a foam box. 6 to 25 fish per ZIC line were initially  
416 analyzed, depending on the fish availability. The ECG machine was held on top of a heating  
417 plate controlled by a heating machine. The subsequent ECG validation in the homozygous  
418 mutants was performed at room temperature (25°C). To analyze the ECG recording, ECG

419 signals were amplified and filtered at 0.5 Hz high pass and 200 Hz low pass. ECG variables,  
420 including heart rate, P-wave amplitude, R-wave amplitude, and PP and RR intervals were  
421 calculated using an in-house Matlab code.<sup>55</sup> A SA episode was defined in zebrafish when  
422 the PP interval is more than 1.5 seconds.

#### 423 **4.4 Mouse ECG and echocardiography**

424 Mouse echocardiography and ECG measurements were performed according to a  
425 previously published protocol with modifications.<sup>26, 27</sup> For ECG, mice were anesthetized with  
426 isoflurane (0.5% to 1.0% v/v) via a nose cone. Mice were placed on an ECG-heater board  
427 with 4 paws on individual electrodes. The ECG-heater board maintained the body  
428 temperature at 37°C. The ECG signal was amplified through an amplifier (Axon CNS digital  
429 1440 A) and recorded using Chart 5 software. For each mouse, 10 min of ECG signal were  
430 recorded. Series of ECG parameters, including heart rate, P-wave amplitude, R-wave  
431 amplitude, PP/RR interval were calculated by an in-house Matlab code.<sup>55</sup> For  
432 echocardiography, mice were anesthetized under light isoflurane (0.5% to 1.0% v/v)  
433 administered via a nose cone. Echocardiography gel was placed on the shaved chest, and  
434 the mouse heart was imaged with a 13-MHz probe using 2-dimensional echocardiography  
435 (GE Healthcare). All measurements were made by an independent operator to whom the  
436 study groups were masked.

#### 437 **4.5 Administration of autonomic response drugs**

438 For zebrafish, 0.6 µg/g isoproterenol (Millipore Sigma, Cat# 1351005), 4 µg/g atropine  
439 (Millipore Sigma, Cat# A0132), and 0.3 µg/g carbachol (Millipore Sigma, cat# C4382) were

440 administrated via intraperitoneal injection. For *in vivo* mouse studies, 0.2 mg/kg  
441 isoproterenol, 1 mg/kg atropine, and 0.3 mg/kg carbachol was injected intraperitoneally. For  
442 *ex vivo* mouse atrial studies, 100 nM isoproterenol, 2  $\mu$ M atropine, and 300 nM carbachol  
443 was administered via superfusion for 10 - 20 min.

#### 444 **4.6 Antibody immunostaining**

445 Heart samples harvested from mouse SAN tissues were embedded in a tissue freezing  
446 medium, followed by sectioning at 10  $\mu$ m using a cryostat (Leica CM3050 S). The slides  
447 were subjected to immunostaining using a previously described protocol.<sup>56</sup> The following  
448 antibodies were used: anti-HCN4 (Millipore, Cat#: AB5805) at 1:200, anti-Dnajb6 (Novus,  
449 Cat#: H00010049-M01) at 1:200, anti-Islet1 (abcam, Cat#: ab20670), anti-Tbx3 (abcam,  
450 Cat#: ab99302). All images were captured either using a Zeiss Axioplan II microscope  
451 equipped with ApoTome and AxioVision software (Carl Zeiss Microscopy) or a Zeiss LSM  
452 780 confocal microscope.

#### 453 **4.7 Isolated mouse atrial preparations**

454 The mouse atrial preparation was performed as previously described.<sup>57</sup> After the mice were  
455 anesthetized with isoflurane, a mid-sternal incision was applied. The heart was then  
456 removed and cannulated to a custom made 21-gauge cannula. The heart was then perfused  
457 and superfused with oxygenated (95% O<sub>2</sub>, 5% CO<sub>2</sub>), 37°C modified Tyrode solution (in mM:  
458 128.2 NaCl, 4.7 KCl, 1.19 NaH<sub>2</sub>PO<sub>4</sub>, 1.05 MgCl<sub>2</sub>, 1.3 CaCl<sub>2</sub>, 20.0 NaHCO<sub>3</sub>, and 11.1  
459 glucose; pH=7.35 $\pm$ 0.05). Lung, thymus and fat tissue was then removed. Perfusion was  
460 maintained under constant aortic pressure of 60-80 mmHg. After 10 min stabilization, the

461 ventricles were dissected. The atrial were cut open as previously described.<sup>58</sup> The medial  
462 limb of the crista terminalis was cut to open right atrial appendage. The preparation was  
463 superfused with Tyrode solution at a constant rate of ~ 15 ml/min.

#### 464 **4.8 Optical mapping**

465 High spatial (100x100 pixels,  $60 \pm 10\mu\text{m}$  per pixel) and temporal (1,000 – 3,000 frames/sec)  
466 resolution optical mapping of electrical activity was applied on the isolated mouse atrial  
467 preparations as previously described.<sup>58, 59</sup> The isolated mouse atrial preparations were  
468 coronary and surface stained with voltage-sensitive dye RH-237 (1.25 mg/ml in dimethyl  
469 sulfoxide ThermoFisher Scientific, USA). Blebbistatin (10  $\mu\text{M}$ , Tocris Bioscience, USA) was  
470 then applied to reduce the motion artifact. A 150-W halogen lamp (MHAB-150W, Moritex  
471 USA Inc., CA, USA) with band pass filter (530/40 nm) was used as excitation light source.  
472 The fluorescent light emitted from the preparation was recorded by a MiCAM Ultima-L  
473 camera (SciMedia, CA, USA) after a long-pass filter (>650 nm). The acquired fluorescent  
474 signal was digitized, amplified, and visualized using custom software (SciMedia, CA, USA).  
475 After 20-30 min stabilization, activation map was collected during baseline spontaneous  
476 rhythm. To estimate the pacemaker location and a possible pacemaker shift during  
477 autonomic stimulation, the originations of action potentials were plotted with orthogonal axes  
478 crossing at the inferior vena cava. The superior to inferior direction is along the ordinate. The  
479 lateral to media direction is along the abscissa. SAN recovery time (SANRT) was measured  
480 as the time-period between the last S1S1 pacing (10 Hz) beat and the first spontaneous  
481 beat. Corrected SANRT (SANRTc) was calculated as the difference between the SANRT

482 and the resting cycle length measure before the SANRT pacing protocol. After baseline  
483 measurement, 100 nM isoproterenol was applied. Recordings were collected after 10 min  
484 which allows the stimulation to reach steady-state effect. Complete washout was then  
485 performed which is characterized by the recovery of the heart rate back to baseline values.  
486 Additional staining and blebbistatin was applied as needed. 300 nM carbachol then was  
487 applied. 2  $\mu$ M atropine was used after protocols completed during carbachol stimulation.

#### 488 **4.9 RNA-seq data collection and analysis**

489 Total RNA was extracted from the right atrium (RA) tissues of 1-year-old *Dnajb6*<sup>+/-</sup>  
490 heterozygous mutant hearts and WT sibling controls. Six total samples (3 biological  
491 replicates for each genotype) were submitted for RNA sequencing (Azenta Life Science, NJ).  
492 Genes were considered to be differentially expressed between the two groups if they  
493 exhibited a greater than 2-fold change and an FDR of less than 0.05 according to the DESeq  
494 approach.<sup>61</sup> Unsupervised hierarchical clustering was performed with Pearson correlation  
495 and scaled based on the fragments per kilobase of transcript per million mapped reads  
496 (FPKM) value using the pheatmap R package (<https://github.com/raivokolde/pheatmap>). The  
497 gene lists of interest were annotated by IPA (QIAGEN) (<http://www.ingenuity.com/>). We  
498 queried the IPA with the gene list of interest to map and generate putative biological  
499 processes/functions, networks, and pathways based on the manually curated knowledge  
500 database of molecular interactions extracted from the public literature. The enriched  
501 pathways and gene networks were generated using both direct and indirect



502 relationships/connectivity. These pathways and networks were ranked by their enrichment  
503 score, which measures the probability that the genes were included in a network by chance.

#### 504 **4.10 Quantitative reverse transcription (RT) PCR**

505 Total RNA was extracted from ~2 mg of right atrium (RA) tissues of 1-year-old *Dnajb6*<sup>+/-</sup>  
506 heterozygous mutant hearts and WT sibling controls using Trizol reagent (ThermoFisher  
507 Scientific) following the manufacturer's instruction. Approximately 1 µg total RNA was used  
508 for reverse transcription (RT) and cDNA synthesis using Superscript III First-Strand  
509 Synthesis System (ThermoFisher Scientific). Real-time quantitative RT-PCR was run in 96-  
510 well optical plates (ThermoFisher Scientific) using an Applied Biosystem Vii 7 System  
511 (ThermoFisher Scientific). Gene expression levels were normalized using the expression  
512 level of glyceraldehyde 3-phosphate dehydrogenase (*gapdh*) by  $-\Delta\Delta Ct$  (cycle threshold)  
513 values. All quantitative RT-PCR primer sequences were listed in Supplemental Table 2.

#### 514 **4.10 Statistics**

515 No sample sizes were calculated before performing the experiments. No animals were  
516 excluded for analysis. Unpaired 2-tailed student's *t*-test was used to compare 2 groups. One-  
517 way Analysis of Variance (ANOVA) or Kruskal-Wallis test followed by post hoc Tukey's test  
518 was used for comparing 3 and more groups. Chi-square test was used for rate comparison.  
519 *P* values less than 0.05 was considered statistically significant. For dot plot graphs, values  
520 are displayed as mean  $\pm$  standard deviation (SD). Sample size (N) represents animal  
521 number, otherwise specifically designated as biological or technical replicates. All statistical

522 analyses were conducted with the Graphpad Prism 7 and/or R Statistical Software Version  
523 3.6.1.

524

## 525 **Acknowledgments**

526 We thank Beninio Gores and Kashia Stragey for managing zebrafish facility and Ronald H.  
527 May for murine echocardiography.

528

## 529 **Sources of Funding**

530 This work was supported in part by grants from the Mayo Foundation to X.X., Grants from  
531 YG Li (Science and Technology Innovation Action Plan of Shanghai, experimental animal  
532 research project 201409005600), NIH R01HL141214, American Heart Association  
533 16SDG29120011, and the Wisconsin Partnership Program 4140 to A.V.G., and American  
534 Heart Association 17POST33370089 and American Heart Association Career Development  
535 Award 846898 to D. L.

536 **Figure Legends**

537 **Figure 1. Screening of 35 ZIC lines identified 3 mutants with increased incidence of**  
538 **SA and/or AVB episodes**

539 **(A)** Representative ECG recordings for 3 heterozygous GBT mutants with incidence of sinus  
540 arrest (SA) and/or atrioventricular block (AVB) episodes compared to WT control. **(B)** RP2  
541 gene-break transposon insertional positions in the 3 candidate SSS mutants.

542 **Figure 2. Dnajb6 is expressed in the SAN in both zebrafish and mouse**

543 **(A-B)** Co-localization analysis of mRFP in *GBT411/dnajb6b* with the reporter line sqET33-  
544 mi59B in which EGFP labels cardiac conduction system (CCS) in zebrafish. The mRFP  
545 reporter for the *GBT411* tagged Dnajb6b protein partially overlaps with the EGFP reporter in  
546 the sqET33-mi59B transgenic line that labels the SAN in embryonic atrium at 3 dpf (A) and  
547 atrio-ventricular canal (AVC) in adult hearts (B). Arrows indicate EGFP+ cells in the sqET33-  
548 mi59B reporter line. A: atrium. V: ventricle. dpf, days post-fertilization. **(C)** The Dnajb6  
549 antibody immunostaining signal largely overlapped with the HCN4 immunostaining signal in  
550 mouse SAN tissues under low magnification. **(D)** Under higher magnification, expression of  
551 Dnajb6 (red) only partially overlapped with HCN4 (green) as revealed by antibody co-  
552 immunostaining. Arrows point to cells with overlapping patterns. Arrowheads point to cells  
553 with no-overlapping. **(E)** Shown are images indicating expression of Dnajb6 protein largely  
554 overlapping with the Tbx3 antibody immunostaining with medium to low intensity, but not  
555 strong signal in the SAN tissues. Arrows point to cells with strong Tbx3 immunostaining  
556 signal. Arrowheads point to cells with medium to low level of Tbx3 immunostaining signal.

557 **(F)** Shown are images indicating expression of *Dnajib6* protein largely overlapping with the  
558 *Islet1*, a transcription factor labeling SAN cells. Arrows point to cells with overlapping  
559 immunostaining signal for both *Dnajib6* and *Islet1*. Scale bars in A, C, 50  $\mu$ m. Scale bars in  
560 B, D, E, F, 20  $\mu$ m.

561 **Figure 3. *Dnajib6*<sup>+/-</sup> mice exhibited increased incidence of SA and AVB and impaired**  
562 **response to autonomic stimuli**

563 **(A)** Schematics of the *Dnajib6* knockout (KO) mice. The insertion of Velocigene cassette  
564 ZEN-Ub1 created a deletion of 36,843 bp nucleotides spanning from the first to the last  
565 intron of the *Dnajib6* gene at the Chromosome 5. The neomycin selection cassette was  
566 excised after crossed to a Cre expression line. **(B)** Representative DNA gel images of PCR  
567 genotyping for identifying WT (300 bp), *Dnajib6*<sup>+/-</sup> heterozygous (hets), and *Dnajib6*<sup>-/-</sup>  
568 homozygous (homo) mutant alleles (700 bp). **(C)** Western blotting and quantification of  
569 *Dnajib6* short (S) and long (L) protein expression in WT and *Dnajib6* mutants. N=3 animal per  
570 group. **(D)** Shown are representative ECG recordings results showing SA and AVB  
571 phenotypes detected in the *Dnajib6*<sup>+/-</sup> mice at 6 months. **(E)** The *Dnajib6*<sup>+/-</sup> mice manifests  
572 impaired response to different autonomic stimuli. N=10-12 mice per group. Unpaired  
573 student's *t*-test. SA, sinus arrest. AVB, atrioventricular block.

574 **Figure 4. SAN dysfunction in the *Dnajib6*<sup>+/-</sup> mice**

575 **(A)** Leading pacemakers were located and plotted from both WT (blue dots) and *Dnajib6*<sup>+/-</sup>  
576 (red dots) mice. One mouse could have multiple leading pacemaker locations due to the  
577 competing pacemakers and ectopic activities. SVC and IVC, superior and inferior vena cava;

578 RAA, right atrial appendage; CT, crista terminalis; IAS, inter-atrial septum; AVN,  
579 atrioventricular node. Distribution of the leading pacemakers is summarized in panel. **(B)**  
580 Majority of leading pacemakers located within the SAN area in WT whereas, in *Dnajib6*<sup>+/-</sup>  
581 mice, significant increase of leading pacemakers locating in subsidiary pacemaker area and  
582 IAS was observed. **(C-D)** Activation map based on the optical mapping of action potentials  
583 showed representative leading pacemaker locations in WT (SAN) and *Dnajib6*<sup>+/-</sup> mice (SAN  
584 and IAS areas). **(E)** Optical mapping on isolated atrial preparation showed bradycardia  
585 (baseline) and different responses of heart rate during isoproterenol, atropine, and carbachol  
586 stimulations between WT and *Dnajib6*<sup>+/-</sup> mice. N=7-9 mice per group. Unpaired student's *t*-  
587 test. **(F)** Increased cycle length (CL) variation was observed in *Dnajib6*<sup>+/-</sup> isolated atrial  
588 preparations during different autonomic stimulations. N=7-9 mice per group. Unpaired  
589 student's *t*-test.

590 **Figure 5. Sinus node recovery time was prolonged in the *Dnajib6*<sup>+/-</sup> mice**

591 **(A-B)** Representative activation maps reconstructed for the last pacing stimulus (S1) and the  
592 first spontaneous post-pacing atrial beat (A1) during SAN recovery time (SANRT)  
593 measurements are shown. A site of the earliest atrial activation is labeled by a white  
594 asterisk. In *Dnajib6*<sup>+/-</sup> group, unlike WT, the first spontaneous post-pacing atrial beat (A1)  
595 originated from an ectopic location outside of the anatomically and functionally defined SAN  
596 area. **(C)** Summarized data for corrected SANRT (SANRTc) measured during different  
597 autonomic stimulations is shown. N=7-9 mice per group. Unpaired student's *t*-test.

598

599 **Figure 6. Transcriptomes are altered in the atrium of *Dnajb6*<sup>+/-</sup> mice**

600 **(A)** Expression of six calcium homeostasis and ion channel related genes were altered in the  
601 *Dnajb6*<sup>+/-</sup> mice atrium. **(B)** Expression of four Wnt pathway related genes were altered in the  
602 *Dnajb6*<sup>+/-</sup> mice atrium. **(C)** Quantitative polymerase chain reaction (qPCR) validation of DE  
603 genes listed in A and B, normalized to Gapdh; RNA was extracted from an individual mouse  
604 atrium, which was considered a single biological replicate. Samples were collected in  
605 triplicate. N=3 mice per group. Unpaired student's *t*-test.

606 **References**

- 607 1. Khurshid S, Choi SH, Weng LC, Wang EY, Trinquart L, Benjamin EJ, Ellinor PT and Lubitz SA. Frequency  
608 of Cardiac Rhythm Abnormalities in a Half Million Adults. *Circ Arrhythm Electrophysiol*. 2018;11:e006273.
- 609 2. Semelka M, Gera J and Usman S. Sick sinus syndrome: a review. *Am Fam Physician*. 2013;87:691-6.
- 610 3. De Ponti R, Marazzato J, Bagliani G, Leonelli FM and Padeletti L. Sick Sinus Syndrome. *Card*  
611 *Electrophysiol Clin*. 2018;10:183-195.
- 612 4. Dakkak W and Doukky R. Sick Sinus Syndrome *StatPearls* Treasure Island (FL); 2020.
- 613 5. Mond HG and Proclemer A. The 11th world survey of cardiac pacing and implantable cardioverter-  
614 defibrillators: calendar year 2009--a World Society of Arrhythmia's project. *Pacing Clin Electrophysiol*.  
615 2011;34:1013-27.
- 616 6. Nof E, Luria D, Brass D, Marek D, Lahat H, Reznik-Wolf H, Pras E, Dascal N, Eldar M and Glikson M.  
617 Point mutation in the HCN4 cardiac ion channel pore affecting synthesis, trafficking, and functional expression  
618 is associated with familial asymptomatic sinus bradycardia. *Circulation*. 2007;116:463-70.
- 619 7. Tan HL, Bink-Boelkens MT, Bezzina CR, Viswanathan PC, Beaufort-Krol GC, van Tintelen PJ, van den  
620 Berg MP, Wilde AA and Balsler JR. A sodium-channel mutation causes isolated cardiac conduction disease.  
621 *Nature*. 2001;409:1043-7.
- 622 8. Schulze-Bahr E, Neu A, Friederich P, Kaupp UB, Breithardt G, Pongs O and Isbrandt D. Pacemaker  
623 channel dysfunction in a patient with sinus node disease. *J Clin Invest*. 2003;111:1537-45.
- 624 9. Verkerk AO and Wilders R. Pacemaker activity of the human sinoatrial node: an update on the effects  
625 of mutations in HCN4 on the hyperpolarization-activated current. *Int J Mol Sci*. 2015;16:3071-94.
- 626 10. Anderson JB and Benson DW. Genetics of Sick Sinus Syndrome. *Card Electrophysiol Clin*. 2010;2:499-  
627 507.
- 628 11. Holm H, Gudbjartsson DF, Sulem P, Masson G, Helgadóttir HT, Zanon C, Magnusson OT, Helgason A,  
629 Saemundsdóttir J, Gylfason A, Stefansdóttir H, Gretarsdóttir S, Matthiasson SE, Thorgeirsson GM, Jonasdóttir  
630 A, Sigurdsson A, Stefansson H, Werge T, Rafnar T, Kiemeneý LA, Parvez B, Muhammad R, Roden DM, Darbar D,  
631 Thorleifsson G, Walters GB, Kong A, Thorsteinsdóttir U, Arnar DO and Stefansson K. A rare variant in MYH6 is  
632 associated with high risk of sick sinus syndrome. *Nat Genet*. 2011;43:316-20.
- 633 12. Zhu YB, Luo JW, Jiang F and Liu G. Genetic analysis of sick sinus syndrome in a family harboring  
634 compound CACNA1C and TTN mutations. *Mol Med Rep*. 2018;17:7073-7080.
- 635 13. Monfredi O and Boyett MR. Sick sinus syndrome and atrial fibrillation in older persons - A view from  
636 the sinoatrial nodal myocyte. *J Mol Cell Cardiol*. 2015;83:88-100.
- 637 14. Lin J and Musunuru K. From Genotype to Phenotype: A Primer on the Functional Follow-up of  
638 Genome-Wide Association Studies in Cardiovascular Disease. *Circ Genom Precis Med*. 2018;11.
- 639 15. Tam V, Patel N, Turcotte M, Bosse Y, Pare G and Meyre D. Benefits and limitations of genome-wide  
640 association studies. *Nat Rev Genet*. 2019;20:467-484.
- 641 16. Kamp A, Peterson MA, Svenson KL, Bjork BC, Hentges KE, Rajapaksha TW, Moran J, Justice MJ,  
642 Seidman JG, Seidman CE, Moskowitz IP and Beier DR. Genome-wide identification of mouse congenital heart  
643 disease loci. *Hum Mol Genet*. 2010;19:3105-13.
- 644 17. Shen Y, Leatherbury L, Rosenthal J, Yu Q, Pappas MA, Wessels A, Lucas J, Siegfried B, Chatterjee B,  
645 Svenson K and Lo CW. Cardiovascular phenotyping of fetal mice by noninvasive high-frequency ultrasound

646 facilitates recovery of ENU-induced mutations causing congenital cardiac and extracardiac defects. *Physiol*  
647 *Genomics*. 2005;24:23-36.

648 18. Gut P, Reischauer S, Stainier DYR and Arnaout R. Little Fish, Big Data: Zebrafish as a Model for  
649 Cardiovascular and Metabolic Disease. *Physiol Rev*. 2017;97:889-938.

650 19. Bakkers J. Zebrafish as a model to study cardiac development and human cardiac disease. *Cardiovasc*  
651 *Res*. 2011;91:279-88.

652 20. Ding Y, Bu H and Xu X. Modeling Inherited Cardiomyopathies in Adult Zebrafish for Precision  
653 *Medicine*. *Front Physiol*. 2020;11:599244.

654 21. Amsterdam A, Burgess S, Golling G, Chen W, Sun Z, Townsend K, Farrington S, Haldi M and Hopkins N.  
655 A large-scale insertional mutagenesis screen in zebrafish. *Genes Dev*. 1999;13:2713-24.

656 22. Wang D, Jao LE, Zheng N, Dolan K, Ivey J, Zonies S, Wu X, Wu K, Yang H, Meng Q, Zhu Z, Zhang B, Lin S  
657 and Burgess SM. Efficient genome-wide mutagenesis of zebrafish genes by retroviral insertions. *Proc Natl Acad*  
658 *Sci U S A*. 2007;104:12428-33.

659 23. Clark KJ, Balciunas D, Pogoda HM, Ding Y, Westcot SE, Bedell VM, Greenwood TM, Urban MD, Skuster  
660 KJ, Petzold AM, Ni J, Nielsen AL, Patowary A, Scaria V, Sivasubbu S, Xu X, Hammerschmidt M and Ekker SC. In  
661 vivo protein trapping produces a functional expression codex of the vertebrate proteome. *Nat Methods*.  
662 2011;8:506-15.

663 24. Ichino N, Serres MR, Urban RM, Urban MD, Treichel AJ, Schaeffbauer KJ, Greif LE, Varshney GK, Skuster  
664 KJ, McNulty MS, Daby CL, Wang Y, Liao HK, El-Rass S, Ding Y, Liu W, Anderson JL, Wishman MD, Sabharwal A,  
665 Schimmenti LA, Sivasubbu S, Balciunas D, Hammerschmidt M, Farber SA, Wen XY, Xu X, McGrail M, Essner JJ,  
666 Burgess SM, Clark KJ and Ekker SC. Building the vertebrate codex using the gene breaking protein trap library.  
667 *Elife*. 2020;9.

668 25. Ding Y, Liu W, Deng Y, Jomok B, Yang J, Huang W, Clark KJ, Zhong TP, Lin X, Ekker SC and Xu X.  
669 Trapping cardiac recessive mutants via expression-based insertional mutagenesis screening. *Circ Res*.  
670 2013;112:606-17.

671 26. Ding Y, Long PA, Bos JM, Shih YH, Ma X, Sundsbak RS, Chen J, Jiang Y, Zhao L, Hu X, Wang J, Shi Y,  
672 Ackerman MJ, Lin X, Ekker SC, Redfield MM, Olson TM and Xu X. A modifier screen identifies DNAJB6 as a  
673 cardiomyopathy susceptibility gene. *JCI Insight*. 2016;1.

674 27. Ding Y, Yang J, Chen P, Lu T, Jiao K, Tester DJ, Giudicessi JR, Jiang K, Ackerman MJ, Li Y, Wang DW, Lee  
675 HC, Wang DW and Xu X. Knockout of SORBS2 Protein Disrupts the Structural Integrity of Intercalated Disc and  
676 Manifests Features of Arrhythmogenic Cardiomyopathy. *J Am Heart Assoc*. 2020;9:e017055.

677 28. Ma X, Zhu P, Ding Y, Zhang H, Qiu Q, Dvornikov AV, Wang Z, Kim M, Wang Y, Lowerison M, Yu Y,  
678 Norton N, Herrmann J, Ekker SC, Hsiai TK, Lin X and Xu X. Retinoid X receptor alpha is a spatiotemporally  
679 predominant therapeutic target for anthracycline-induced cardiotoxicity. *Sci Adv*. 2020;6:eaay2939.

680 29. Yan J, Li H, Bu H, Jiao K, Zhang AX, Le T, Cao H, Li Y, Ding Y and Xu X. Aging-associated sinus arrest and  
681 sick sinus syndrome in adult zebrafish. *PLoS One*. 2020;15:e0232457.

682 30. Poon KL, Liebling M, Kondrychyn I, Brand T and Korzh V. Development of the cardiac conduction  
683 system in zebrafish. *Gene Expr Patterns*. 2016;21:89-96.

684 31. Abu Nahia K, Migdal M, Quinn TA, Poon KL, Lapinski M, Sulej A, Liu J, Mondal SS, Pawlak M, Bugajski L,  
685 Piwocka K, Brand T, Kohl P, Korzh V and Winata C. Genomic and physiological analyses of the zebrafish  
686 atrioventricular canal reveal molecular building blocks of the secondary pacemaker region. *Cell Mol Life Sci*.  
687 2021;78:6669-6687.



- 688 32. Liang X, Zhang Q, Cattaneo P, Zhuang S, Gong X, Spann NJ, Jiang C, Cao X, Zhao X, Zhang X, Bu L, Wang  
689 G, Chen HS, Zhuang T, Yan J, Geng P, Luo L, Banerjee I, Chen Y, Glass CK, Zambon AC, Chen J, Sun Y and Evans  
690 SM. Transcription factor ISL1 is essential for pacemaker development and function. *J Clin Invest*.  
691 2015;125:3256-68.
- 692 33. Boyett MR, Honjo H and Kodama I. The sinoatrial node, a heterogeneous pacemaker structure.  
693 *Cardiovasc Res*. 2000;47:658-87.
- 694 34. Liang D, Xue J, Geng L, Zhou L, Lv B, Zeng Q, Xiong K, Zhou H, Xie D, Zhang F, Liu J, Liu Y, Li L, Yang J,  
695 Xue Z and Chen YH. Cellular and molecular landscape of mammalian sinoatrial node revealed by single-cell  
696 RNA sequencing. *Nat Commun*. 2021;12:287.
- 697 35. Hunter PJ, Swanson BJ, Haendel MA, Lyons GE and Cross JC. Mrj encodes a DnaJ-related co-chaperone  
698 that is essential for murine placental development. *Development*. 1999;126:1247-58.
- 699 36. Glukhov AV, Fedorov VV, Anderson ME, Mohler PJ and Efimov IR. Functional anatomy of the murine  
700 sinus node: high-resolution optical mapping of ankyrin-B heterozygous mice. *Am J Physiol Heart Circ Physiol*.  
701 2010;299:H482-91.
- 702 37. Liu J, Dobrzynski H, Yanni J, Boyett MR and Lei M. Organisation of the mouse sinoatrial node:  
703 structure and expression of HCN channels. *Cardiovasc Res*. 2007;73:729-38.
- 704 38. Verheijck EE, van Kempen MJ, Veereschild M, Lurvink J, Jongsma HJ and Bouman LN.  
705 Electrophysiological features of the mouse sinoatrial node in relation to connexin distribution. *Cardiovasc Res*.  
706 2001;52:40-50.
- 707 39. Liang W, Han P, Kim EH, Mak J, Zhang R, Torrente AG, Goldhaber JI, Marban E and Cho HC. Canonical  
708 Wnt signaling promotes pacemaker cell specification of cardiac mesodermal cells derived from mouse and  
709 human embryonic stem cells. *Stem Cells*. 2020;38:352-368.
- 710 40. Ren J, Han P, Ma X, Farah EN, Bloomekatz J, Zeng XI, Zhang R, Swim MM, Witty AD, Knight HG,  
711 Deshpande R, Xu W, Yelon D, Chen S and Chi NC. Canonical Wnt5b Signaling Directs Outlying Nkx2.5+  
712 Mesoderm into Pacemaker Cardiomyocytes. *Dev Cell*. 2019;50:729-743 e5.
- 713 41. Gillis J, Schipper-Krom S, Juenemann K, Gruber A, Coolen S, van den Nieuwendijk R, van Veen H,  
714 Overkleeft H, Goedhart J, Kampinga HH and Reits EA. The DNAJB6 and DNAJB8 protein chaperones prevent  
715 intracellular aggregation of polyglutamine peptides. *J Biol Chem*. 2013;288:17225-37.
- 716 42. Hageman J, Rujano MA, van Waarde MA, Kakkar V, Dirks RP, Govorukhina N, Oosterveld-Hut HM,  
717 Lubsen NH and Kampinga HH. A DNAJB chaperone subfamily with HDAC-dependent activities suppresses toxic  
718 protein aggregation. *Mol Cell*. 2010;37:355-69.
- 719 43. Sarparanta J, Jonson PH, Golzio C, Sandell S, Luque H, Screen M, McDonald K, Stajich JM, Mahjneh I,  
720 Vihola A, Raheem O, Penttila S, Lehtinen S, Huovinen S, Palmio J, Tasca G, Ricci E, Hackman P, Hauser M,  
721 Katsanis N and Udd B. Mutations affecting the cytoplasmic functions of the co-chaperone DNAJB6 cause limb-  
722 girdle muscular dystrophy. *Nat Genet*. 2012;44:450-5, S1-2.
- 723 44. Hoogaars WM, Engel A, Brons JF, Verkerk AO, de Lange FJ, Wong LY, Bakker ML, Clout DE, Wakker V,  
724 Barnett P, Ravesloot JH, Moorman AF, Verheijck EE and Christoffels VM. Tbx3 controls the sinoatrial node gene  
725 program and imposes pacemaker function on the atria. *Genes Dev*. 2007;21:1098-112.
- 726 45. Mohan RA, Bosada FM, van Weerd JH, van Duijvenboden K, Wang J, Mommersteeg MTM, Hooijkaas  
727 IB, Wakker V, de Gier-de Vries C, Coronel R, Boink GJJ, Bakkens J, Barnett P, Boukens BJ and Christoffels VM. T-  
728 box transcription factor 3 governs a transcriptional program for the function of the mouse atrioventricular  
729 conduction system. *Proc Natl Acad Sci U S A*. 2020;117:18617-18626.

- 730 46. Honjo H, Boyett MR, Kodama I and Toyama J. Correlation between electrical activity and the size of  
731 rabbit sino-atrial node cells. *J Physiol*. 1996;496 ( Pt 3):795-808.
- 732 47. Mangoni ME and Nargeot J. Properties of the hyperpolarization-activated current (I<sub>f</sub>) in isolated  
733 mouse sino-atrial cells. *Cardiovasc Res*. 2001;52:51-64.
- 734 48. Monfredi O, Tsutsui K, Ziman B, Stern MD, Lakatta EG and Maltsev VA. Electrophysiological  
735 heterogeneity of pacemaker cells in the rabbit intercaval region, including the SA node: insights from recording  
736 multiple ion currents in each cell. *Am J Physiol Heart Circ Physiol*. 2018;314:H403-H414.
- 737 49. Wilders R, Verheijck EE, Kumar R, Goolsby WN, van Ginneken AC, Joyner RW and Jongsma HJ. Model  
738 clamp and its application to synchronization of rabbit sinoatrial node cells. *Am J Physiol*. 1996;271:H2168-82.
- 739 50. Kim MS, Maltsev AV, Monfredi O, Maltseva LA, Wirth A, Florio MC, Tsutsui K, Riordon DR, Parsons SP,  
740 Tagirova S, Ziman BD, Stern MD, Lakatta EG and Maltsev VA. Heterogeneity of calcium clock functions in  
741 dormant, dysrhythmically and rhythmically firing single pacemaker cells isolated from SA node. *Cell Calcium*.  
742 2018;74:168-179.
- 743 51. Lakatta EG, Maltsev VA and Vinogradova TM. A coupled SYSTEM of intracellular Ca<sup>2+</sup> clocks and  
744 surface membrane voltage clocks controls the timekeeping mechanism of the heart's pacemaker. *Circ Res*.  
745 2010;106:659-73.
- 746 52. Lang D and Glukhov AV. Cellular and Molecular Mechanisms of Functional Hierarchy of Pacemaker  
747 Clusters in the Sinoatrial Node: New Insights into Sick Sinus Syndrome. *J Cardiovasc Dev Dis*. 2021;8.
- 748 53. Li N, Hansen BJ, Csepe TA, Zhao J, Ignozzi AJ, Sul LV, Zakharkin SO, Kalyanasundaram A, Davis JP,  
749 Biesiadecki BJ, Kilic A, Janssen PML, Mohler PJ, Weiss R, Hummel JD and Fedorov VV. Redundant and diverse  
750 intranodal pacemakers and conduction pathways protect the human sinoatrial node from failure. *Sci Transl*  
751 *Med*. 2017;9.
- 752 54. Li N, Kalyanasundaram A, Hansen BJ, Artiga EJ, Sharma R, Abudulwahed SH, Helfrich KM, Rozenberg  
753 G, Wu PJ, Zakharkin S, Gyorke S, Janssen PM, Whitson BA, Mokadam NA, Biesiadecki BJ, Accornero F, Hummel  
754 JD, Mohler PJ, Dobrzynski H, Zhao J and Fedorov VV. Impaired neuronal sodium channels cause intranodal  
755 conduction failure and reentrant arrhythmias in human sinoatrial node. *Nat Commun*. 2020;11:512.
- 756 55. Lenning M, Fortunato J, Le T, Clark I, Sherpa A, Yi S, Hofsteen P, Thamilarasu G, Yang J, Xu X, Han HD,  
757 Hsiai TK and Cao H. Real-Time Monitoring and Analysis of Zebrafish Electrocardiogram with Anomaly  
758 Detection. *Sensors (Basel)*. 2017;18.
- 759 56. Sun X, Hoage T, Bai P, Ding Y, Chen Z, Zhang R, Huang W, Jahangir A, Paw B, Li YG and Xu X. Cardiac  
760 hypertrophy involves both myocyte hypertrophy and hyperplasia in anemic zebrafish. *PLoS One*. 2009;4:e6596.
- 761 57. Glukhov AV, Kalyanasundaram A, Lou Q, Hage LT, Hansen BJ, Belevych AE, Mohler PJ, Knollmann BC,  
762 Periasamy M, Gyorke S and Fedorov VV. Calsequestrin 2 deletion causes sinoatrial node dysfunction and atrial  
763 arrhythmias associated with altered sarcoplasmic reticulum calcium cycling and degenerative fibrosis within  
764 the mouse atrial pacemaker complex1. *Eur Heart J*. 2015;36:686-97.
- 765 58. Lang D and Glukhov AV. High-resolution Optical Mapping of the Mouse Sino-atrial Node. *J Vis Exp*.  
766 2016.
- 767 59. Lang D, Sulkin M, Lou Q and Efimov IR. Optical mapping of action potentials and calcium transients in  
768 the mouse heart. *J Vis Exp*. 2011.
- 769 60. Lang D, Glukhov AV, Efimova T and Efimov IR. Role of Pyk2 in cardiac arrhythmogenesis. *Am J Physiol*  
770 *Heart Circ Physiol*. 2011;301:H975-83.

771 61. Love MI, Huber W and Anders S. Moderated estimation of fold change and dispersion for RNA-seq  
772 data with DESeq2. *Genome Biol.* 2014;15:550.  
773

# Figure 1

## A

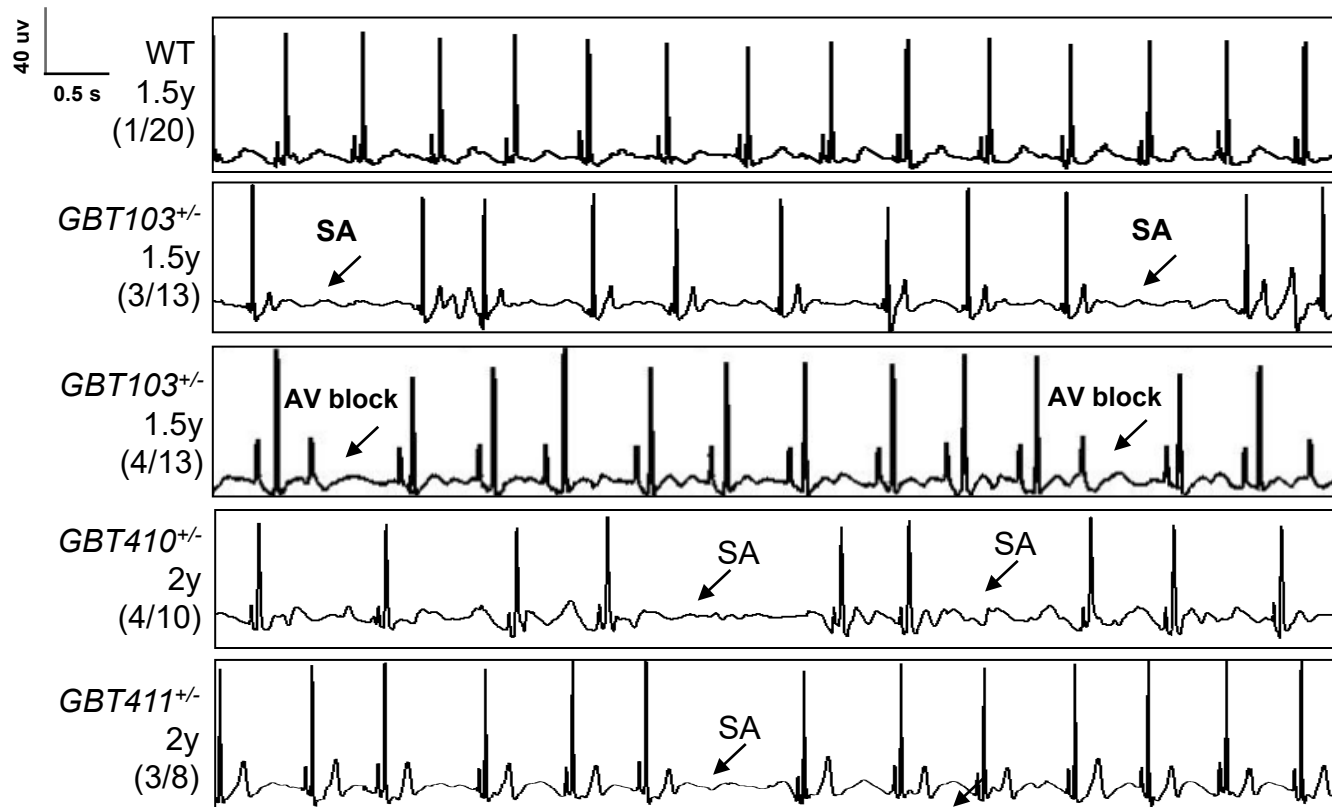

## B

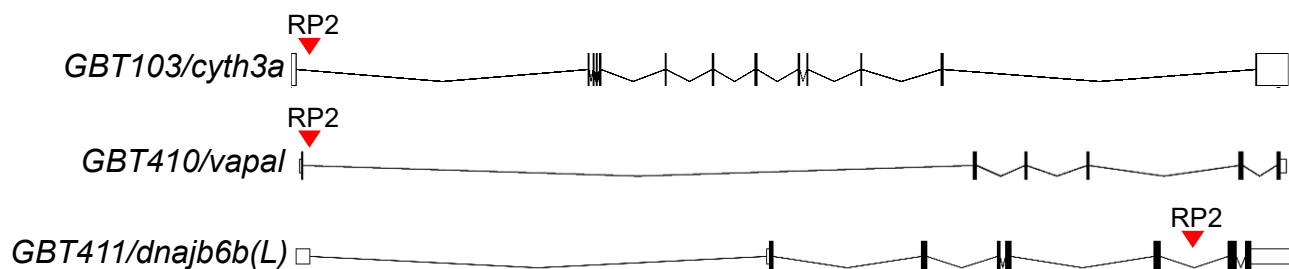

**Figure 1. Screening of 35 ZIC lines identified 3 mutants with increased incidence of SA and/or AVB episodes**

**(A)** Representative ECG recordings for 3 heterozygous GBT mutants with incidence of sinus arrest (SA) and/or atrioventricular block (AVB) episodes compared to WT control. **(B)** RP2 gene-break transposon insertional positions in the 3 candidate SSS mutants.

**Figure 2**

Zebrafish embryonic heart (3 dpf)

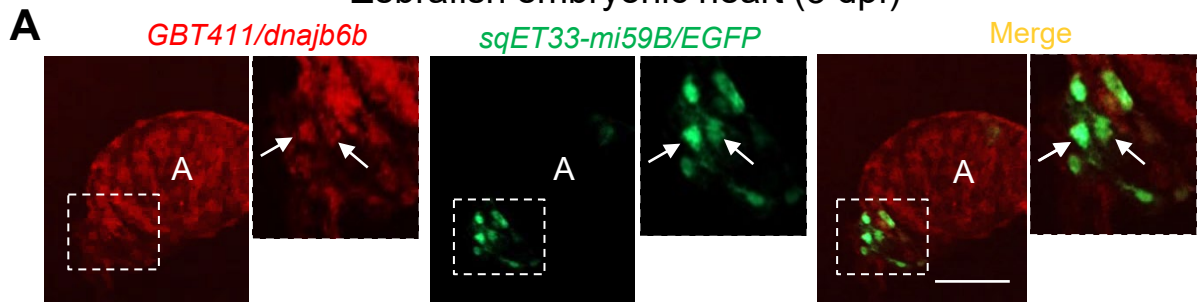

Zebrafish adult heart (3 months)

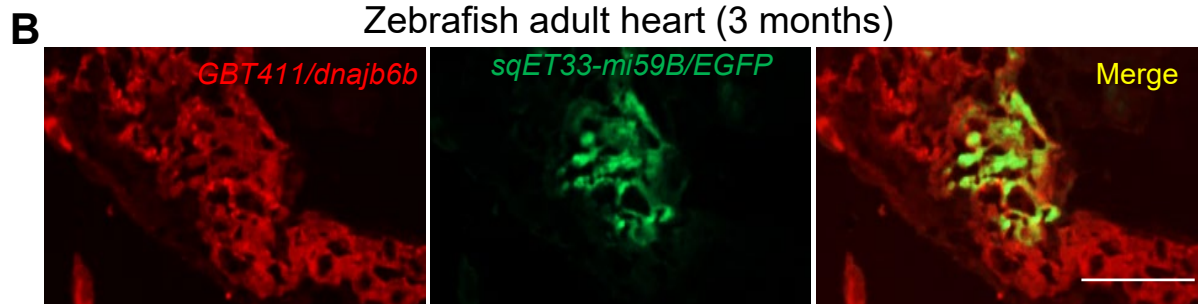

Mouse adult heart (6 months)

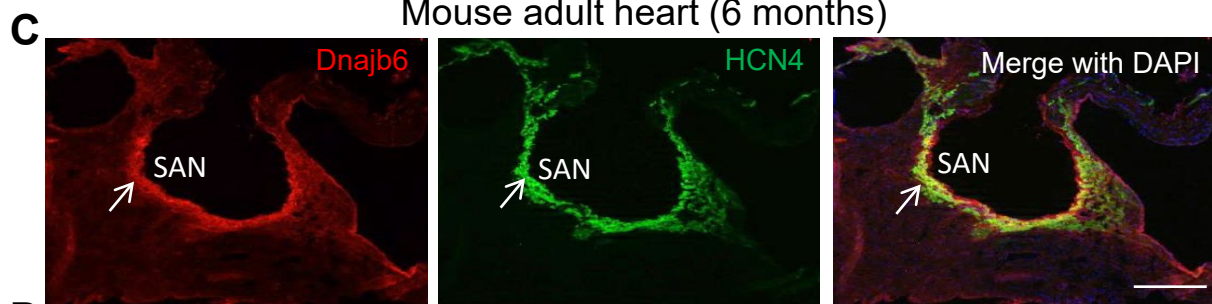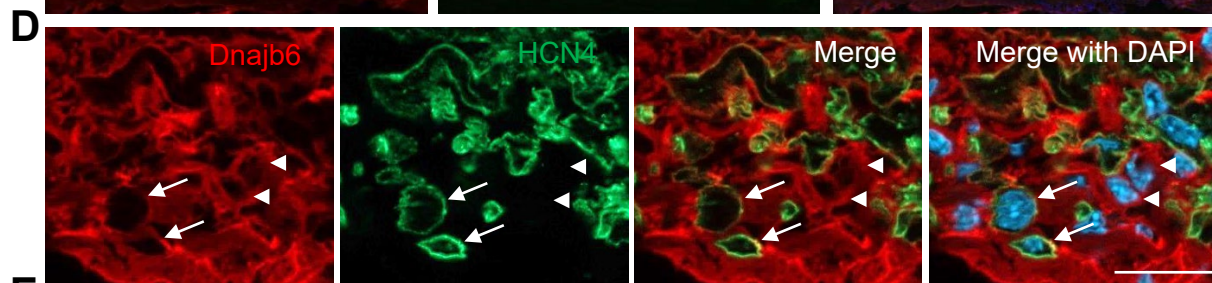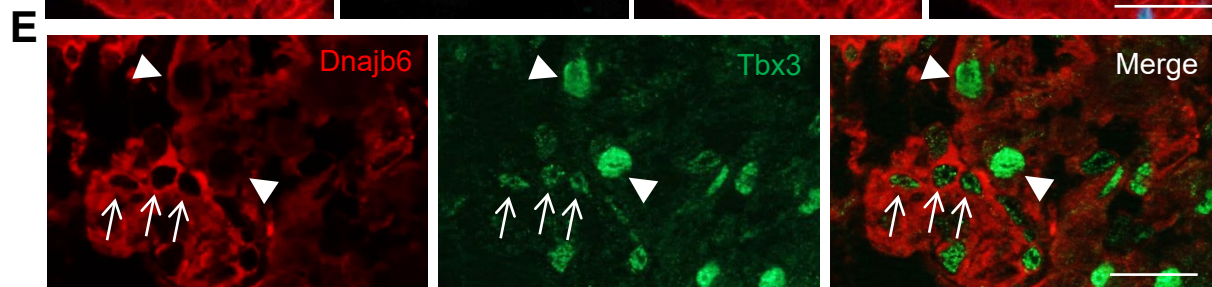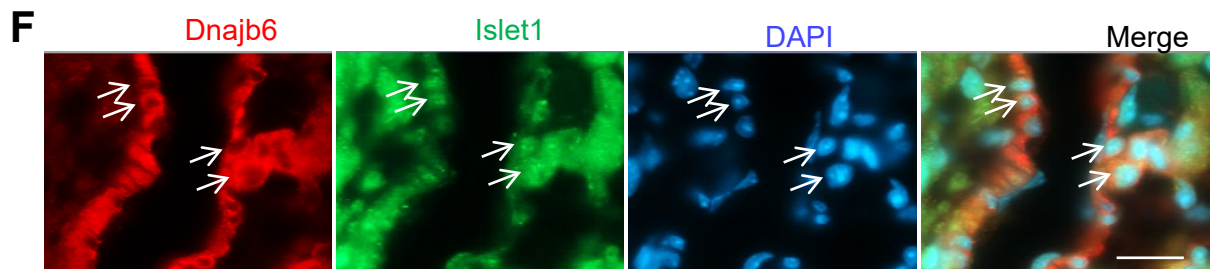

## Figure 2. Dnajb6 is expressed in the SAN in both zebrafish and mouse

**(A-B)** Co-localization analysis of mRFP in *GBT411/dnajb6b* with the reporter line sqET33-mi59B in which EGFP labels cardiac conduction system (CCS) in zebrafish. The mRFP reporter for the *GBT411* tagged Dnajb6b protein partially overlaps with the EGFP reporter in the sqET33-mi59B transgenic line that labels the SAN in embryonic atrium at 3 dpf (A) and atrio-ventricular canal (AVC) in adult hearts (B). Arrows indicate EGFP<sup>+</sup> cells in the sqET33-mi59B reporter line. A: atrium. V: ventricle. dpf, days post-fertilization. **(C)** The Dnajb6 antibody immunostaining signal largely overlapped with the HCN4 immunostaining signal in mouse SAN tissues under low magnification. **(D)** Under higher magnification, expression of Dnajb6 (red) only partially overlapped with HCN4 (green) as revealed by antibody co-immunostaining. Arrows point to cells with overlapping patterns. Arrowheads point to cells with no-overlapping. **(E)** Shown are images indicating expression of Dnajb6 protein largely overlapping with the Tbx3 antibody immunostaining with medium to low intensity, but not strong signal in the SAN tissues. Arrows point to cells with strong Tbx3 immunostaining signal. Arrowheads point to cells with medium to low level of Tbx3 immunostaining signal. **(F)** Shown are images indicating expression of Dnajb6 protein largely overlapping with the Islet1, a transcription factor labeling SAN cells. Arrows point to cells with overlapping immunostaining signal for both Dnajb6 and Islet1. Scale bars in A, C, 50  $\mu\text{m}$ . Scale bars in B, D, E, F, 20  $\mu\text{m}$ .

**Figure 3**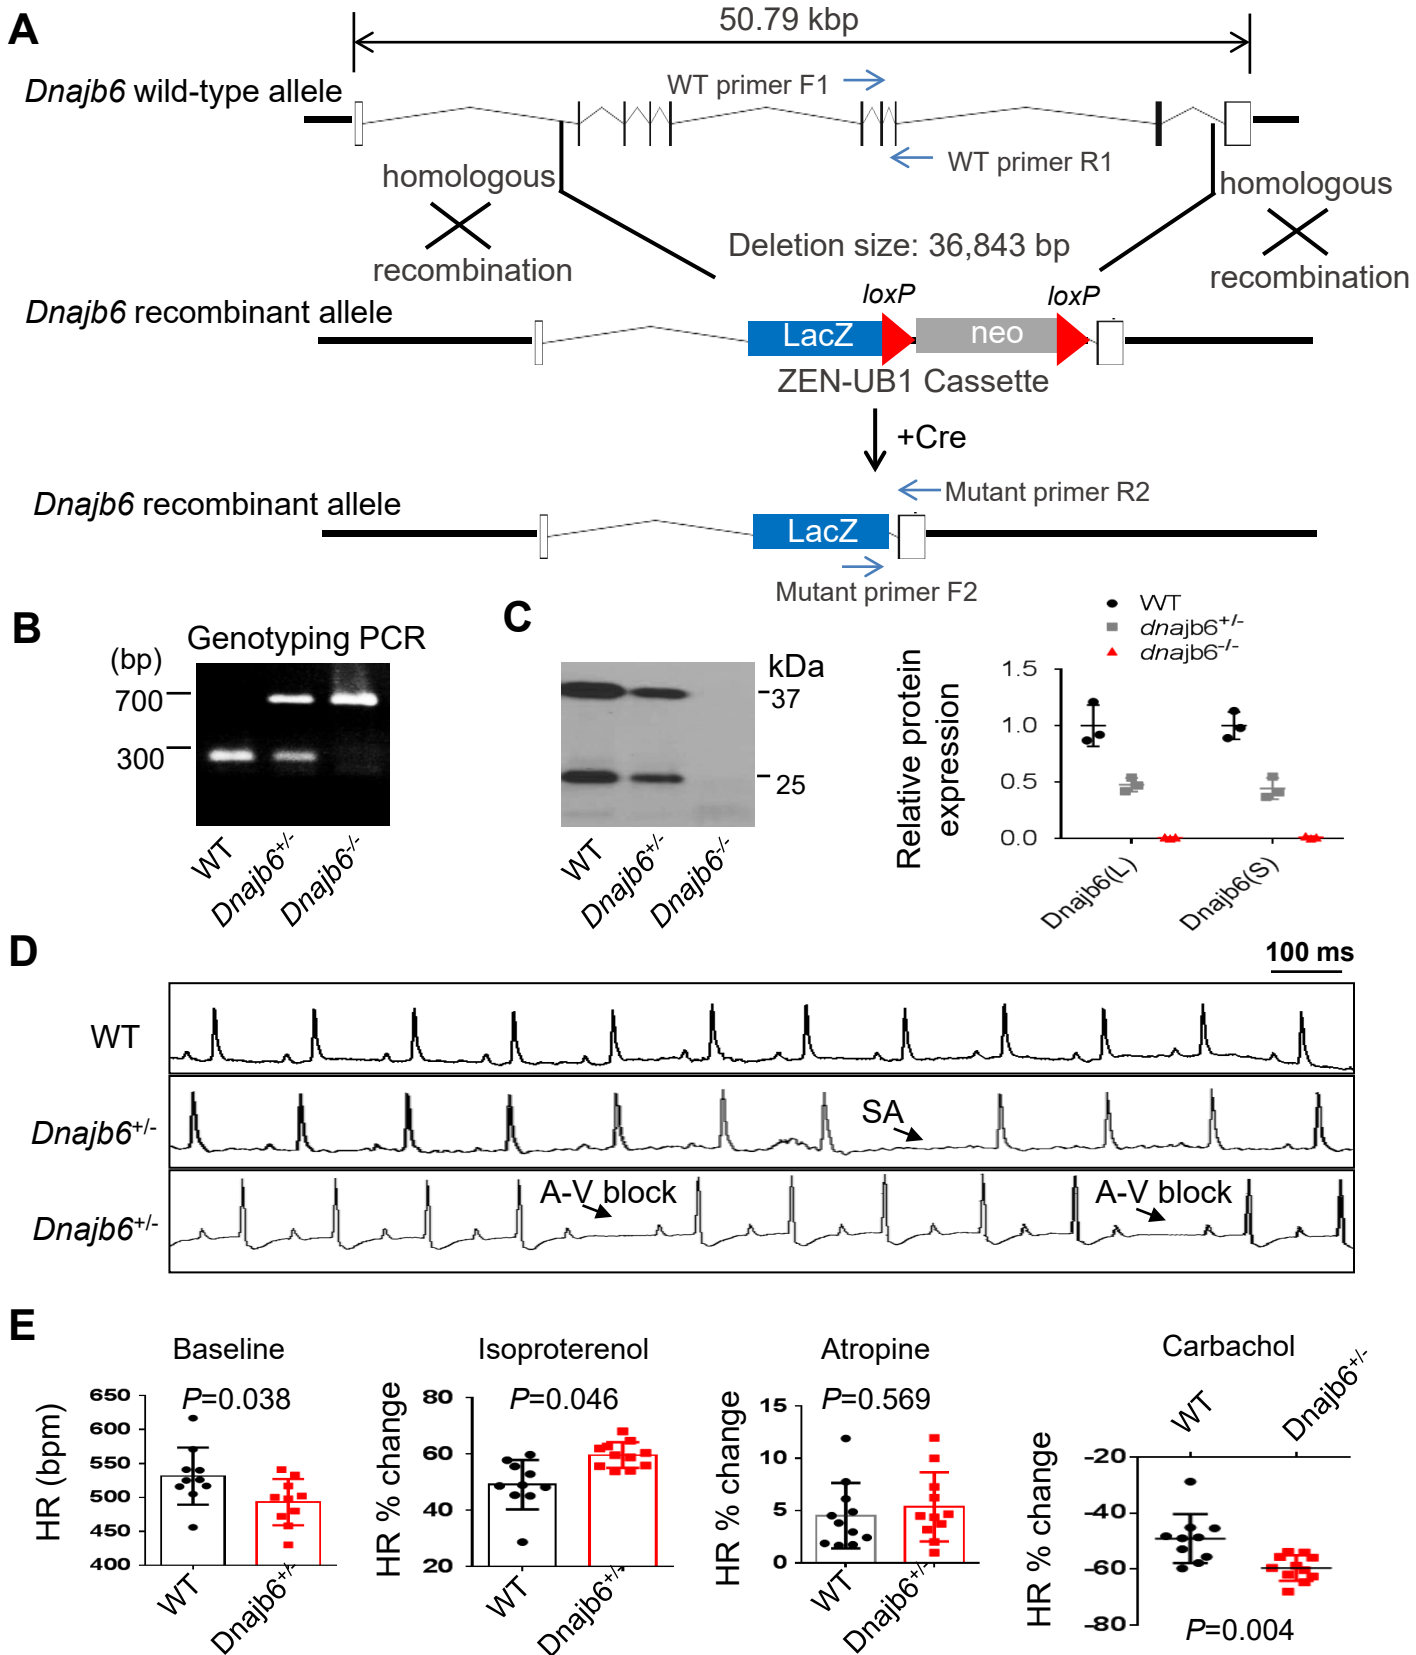

**Figure 3. *Dnajib6*<sup>+/-</sup> mice exhibited increased incidence of SA and AVB and impaired response to autonomic stimuli**

**(A)** Schematics of the *Dnajib6* knockout (KO) mice. The insertion of Velocigene cassette ZEN-Ub1 created a deletion of 36,843 bp nucleotides spanning from the first to the last intron of the *Dnajib6* gene at the Chromosome 5. The neomycin selection cassette was excised after crossed to a Cre expression line. **(B)** Representative DNA gel images of PCR genotyping for identifying WT (300 bp), *Dnajib6*<sup>+/-</sup> heterozygous (hets), and *Dnajib6*<sup>-/-</sup> homozygous (homo) mutant alleles (700 bp). **(C)** Western blotting and quantification of *Dnajib6* short (S) and long (L) protein expression in WT and *Dnajib6* mutants. N=3 animal per group. **(D)** Shown are representative ECG recordings results showing SA and AVB phenotypes detected in the *Dnajib6*<sup>+/-</sup> mice at 6 months. **(E)** The *Dnajib6*<sup>+/-</sup> mice manifests impaired response to different autonomic stimuli. N=10-12 mice per group. Unpaired student's *t*-test. SA, sinus arrest. AVB, atrioventricular block.



**Figure 4**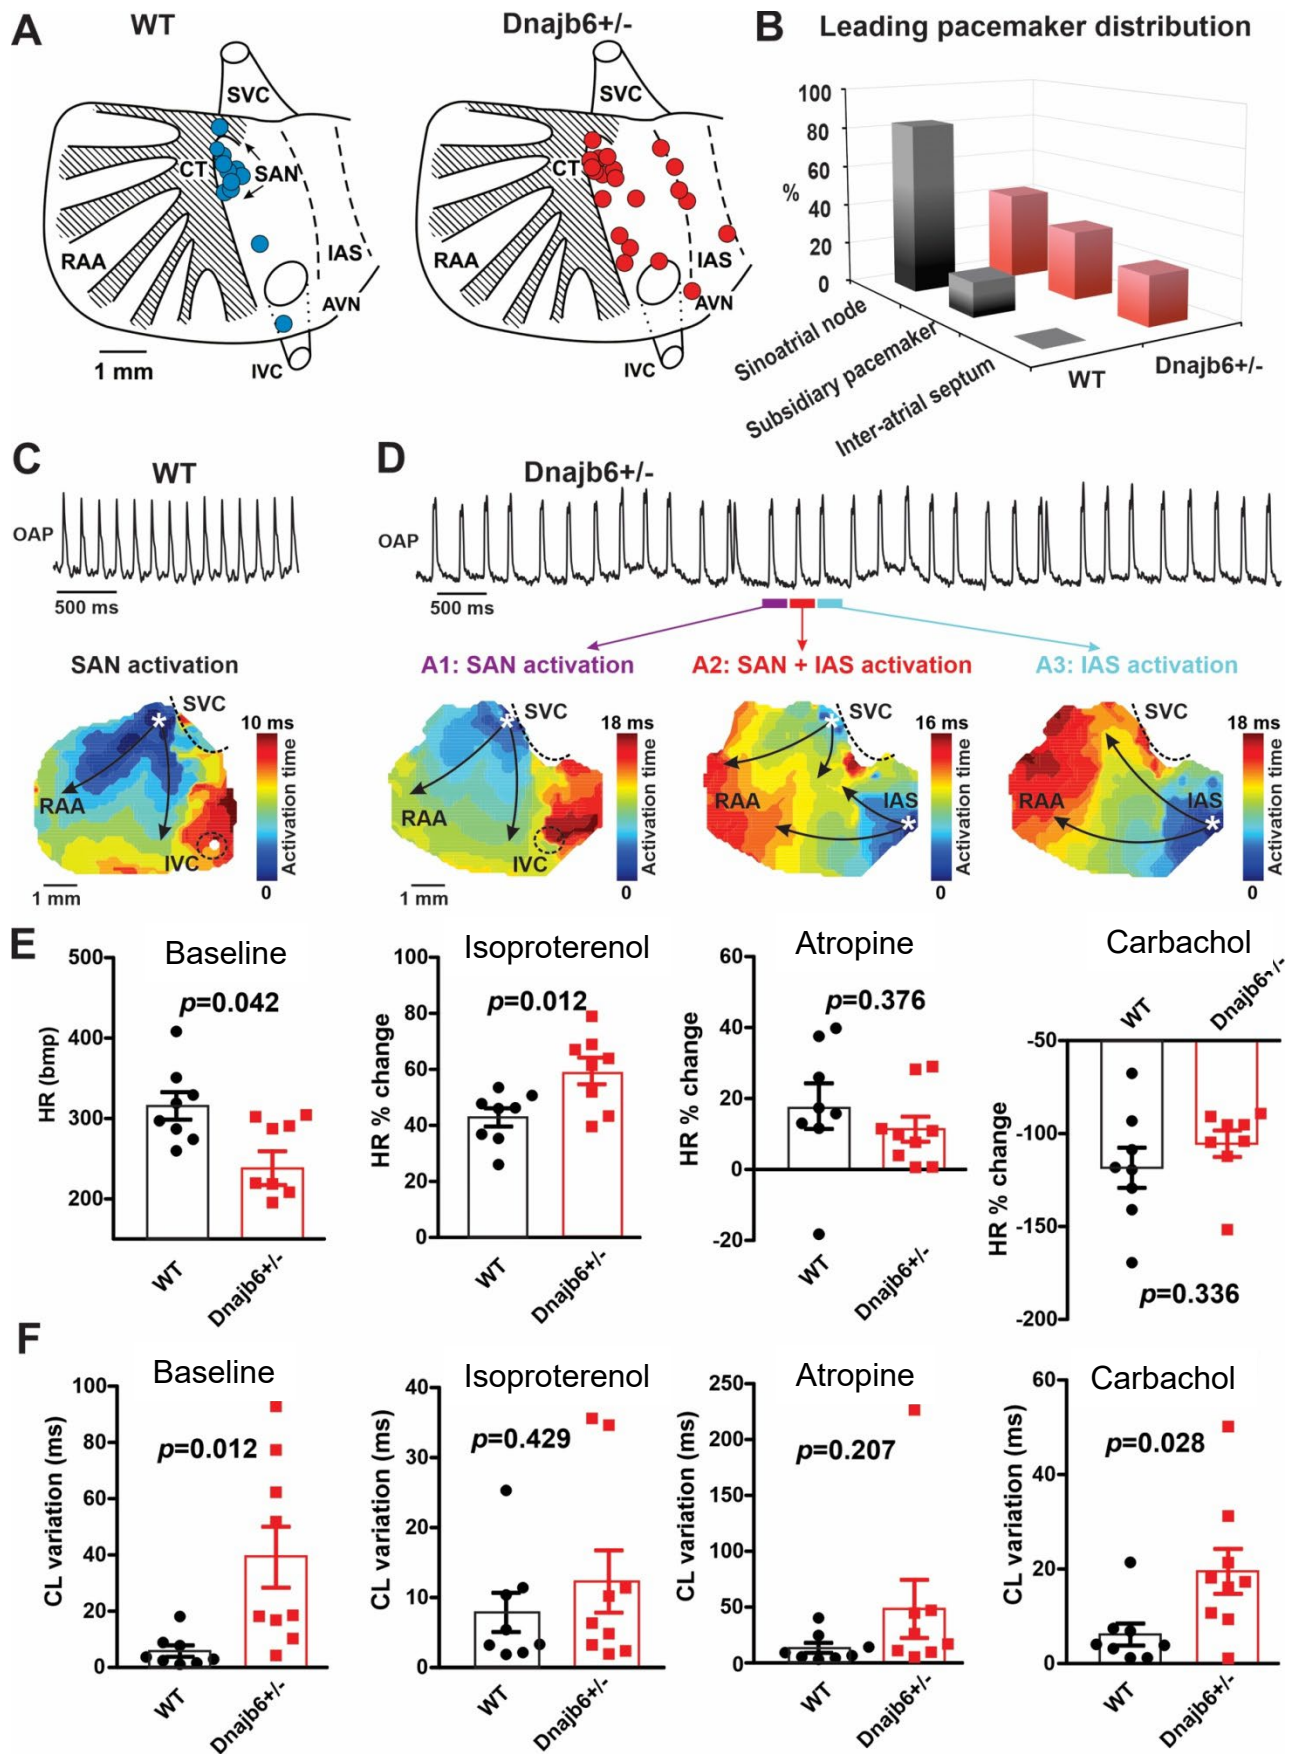

#### **Figure 4. SAN dysfunction in the *Dnajib6*<sup>+/-</sup> mice**

**(A)** Leading pacemakers were located and plotted from both WT (blue dots) and *Dnajib6*<sup>+/-</sup> (red dots) mice. One mouse could have multiple leading pacemaker locations due to the competing pacemakers and ectopic activities. SVC and IVC, superior and inferior vena cava; RAA, right atrial appendage; CT, crista terminalis; IAS, inter-atrial septum; AVN, atrioventricular node. Distribution of the leading pacemakers is summarized in panel. **(B)** Majority of leading pacemakers located within the SAN area in WT whereas, in *Dnajib6*<sup>+/-</sup> mice, significant increase of leading pacemakers locating in subsidiary pacemaker area and IAS was observed. **(C-D)** Activation map based on the optical mapping of action potentials showed representative leading pacemaker locations in WT (SAN) and *Dnajib6*<sup>+/-</sup> mice (SAN and IAS areas). **(E)** Optical mapping on isolated atrial preparation showed bradycardia (baseline) and different responses of heart rate during isoproterenol, atropine, and carbachol stimulations between WT and *Dnajib6*<sup>+/-</sup> mice. N=7-9 mice per group. Unpaired student's *t*-test. **(F)** Increased cycle length (CL) variation was observed in *Dnajib6*<sup>+/-</sup> isolated atrial preparations during different autonomic stimulations. N=7-9 mice per group. Unpaired student's *t*-test.

Figure 5

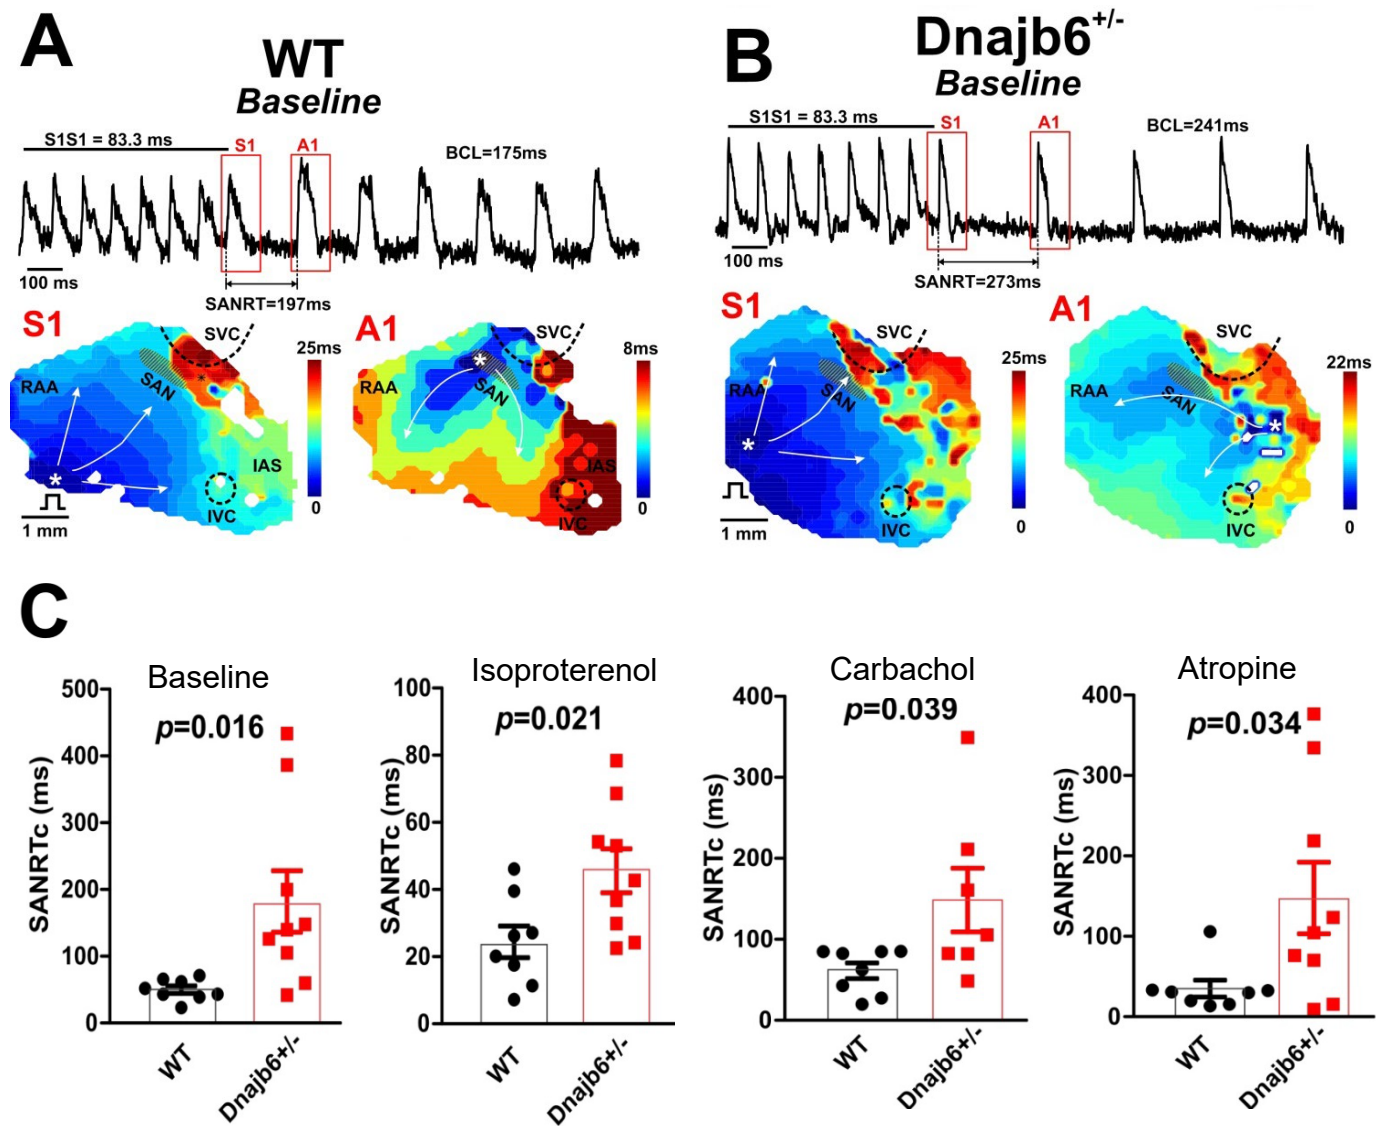

**Figure 5. Sinus node recovery time was prolonged in the *Dnajb6*<sup>+/-</sup> mice**

(A-B) Representative activation maps reconstructed for the last pacing stimulus (S1) and the first spontaneous post-pacing atrial beat (A1) during SAN recovery time (SANRT) measurements are shown. A site of the earliest atrial activation is labeled by a white asterisk. In *Dnajb6*<sup>+/-</sup> group, unlike WT, the first spontaneous post-pacing atrial beat (A1) originated from an ectopic location outside of the anatomically and functionally defined SAN area. (C) Summarized data for corrected SANRT (SANRTc) measured during different autonomic stimulations is shown. N=7-9 mice per group. Unpaired student's *t*-test.

**Figure 6****A****Six calcium homeostasis and ion channel related DE genes**

| Ensemble ID         | Gene            | Protein                                              | Log2 FC | P value  | Gene Ontology/Function Annotation                             |
|---------------------|-----------------|------------------------------------------------------|---------|----------|---------------------------------------------------------------|
| ENSMUSG000000037996 | <i>Slc24a2</i>  | Solute Carrier Family 24 Member 2                    | 1.27    | 0.000623 | Cellular calcium ion homeostasis and calcium channel activity |
| ENSMUSG000000059742 | <i>Kcnh7</i>    | Potassium Voltage-Gated Channel Subfamily H Member 7 | 1.21    | 8.32E-06 | Voltage-gated potassium channel activity                      |
| ENSMUSG000000050840 | <i>Cdh20</i>    | Cadherin 20                                          | 1.52    | 1.37E-06 | Calcium ion binding and calcium-dependent cell-cell adhesion  |
| ENSMUSG000000009687 | <i>Fxyd5</i>    | FXYP-domain containing ion transport regulator       | -1.01   | 0.000376 | Ion transport and sodium channel regulator activity           |
| ENSMUSG000000020733 | <i>Slc9a3r1</i> | Na(+)/H(+) exchange regulatory cofactor NHE-RF       | -1.19   | 0.000253 | Sodium/hydrogen exchanger regulatory cofactor                 |
| ENSMUSG000000042357 | <i>Gjb5</i>     | Gap junction protein                                 |         |          | Gap junction channel activity                                 |

**B****Four Wnt pathway related DE genes**

| Ensemble ID         | Gene          | Protein                                       | Log2 FC | P value  | Gene Ontology/Function Annotation             |
|---------------------|---------------|-----------------------------------------------|---------|----------|-----------------------------------------------|
| ENSMUSG000000032064 | <i>Dixdc1</i> | Dishevelled/Axin domains 1 containing protein | 1.00    | 1.77E-05 | Regulator of Wnt signaling pathway            |
| ENSMUSG00000010797  | <i>Wnt2</i>   | Wnt family member 2                           | -1.23   | 0.000159 | Canonical Wnt signaling pathway               |
| ENSMUSG000000018486 | <i>Wnt9b</i>  | Wnt family member 9B                          | -2.27   | 3.18E-05 | Canonical Wnt signaling pathway               |
| ENSMUSG000000070348 | <i>Ccnd1</i>  | G1/S-specific cyclin-D1                       | -1.03   | 0.000451 | A direct target gene of Wnt signaling pathway |

**C**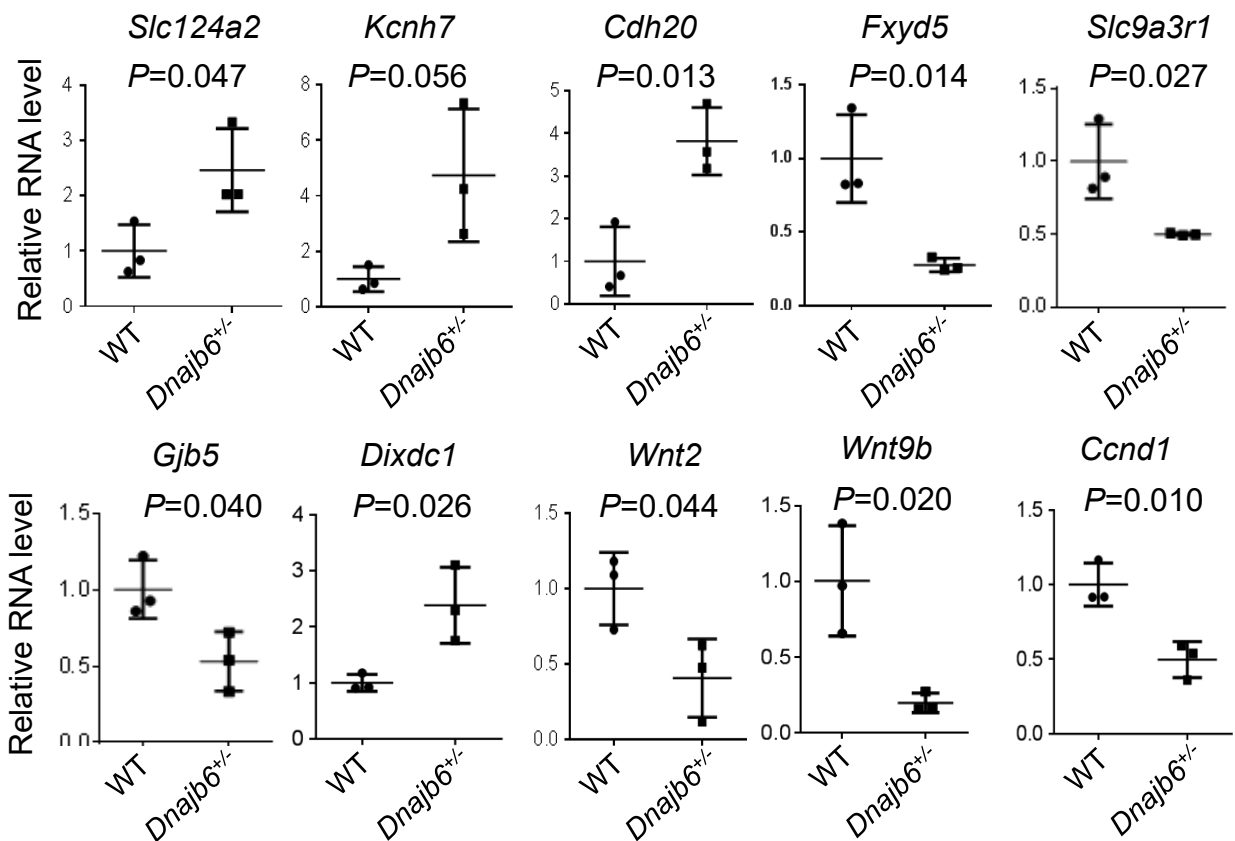

**Figure 6. Transcriptomes are altered in the atrium of *Dnajb6*<sup>+/-</sup> mice**

**(A)** Expression of six calcium homeostasis and ion channel related genes were altered in the *Dnajb6*<sup>+/-</sup> mice atrium. **(B)** Expression of four Wnt pathway related genes were altered in the *Dnajb6*<sup>+/-</sup> mice atrium. **(C)** Quantitative polymerase chain reaction (qPCR) validation of DE genes listed in A and B, normalized to Gapdh; RNA was extracted from an individual mouse atrium, which was considered a single biological replicate. Samples were collected in triplicate. N=3 mice per group. Unpaired student's *t*-test.

**Table 1.** Collection of 35 zebrafish insertional cardiac (ZIC) mutants

| <b>GBT #</b> | <b>Gene ID</b>    | <b>Human ortholog</b> | <b>Insertion position</b> | <b>OMIM#</b> |
|--------------|-------------------|-----------------------|---------------------------|--------------|
| GBT001       | <i>casz1</i>      | CASZ1                 | 5' UTR                    | 609895       |
| GBT002       | <i>sorbs2b</i>    | SORBS2                | 1 <sup>st</sup> intron    | 616349       |
| GBT103       | <i>cyth3a</i>     | CYTH3                 | 1 <sup>st</sup> intron    | 605081       |
| GBT130       | <i>lrp1b</i>      | LRP1                  | 73 <sup>rd</sup> intron   | 107770       |
| GBT135       | <i>bhlhe41</i>    | BHLHE41               | 2 <sup>nd</sup> intron    | 606200       |
| GBT136       | <i>ano5a</i>      | ANO5                  | 1 <sup>st</sup> intron    | 608662       |
| GBT145       | <i>epr2</i>       | EPN2                  | 1 <sup>st</sup> intron    | 607263       |
| GBT166       | <i>atp1b2a</i>    | ATP1B2A               | 1 <sup>st</sup> intron    | 182331       |
| GBT235       | <i>lrpprc</i>     | LRPPRC                | 22 <sup>nd</sup> intron   | 607544       |
| GBT239       | <i>map7d1b</i>    | MAP7D1                | 1 <sup>st</sup> intron    | NA           |
| GBT249       | <i>b2ml</i>       | B2M                   | 1 <sup>st</sup> intron    | 109700       |
| GBT250       | <i>ptprm</i>      | PTPRM                 | 1 <sup>st</sup> intron    | 176888       |
| GBT268       | <i>idh2</i>       | IDH2                  | 12 <sup>th</sup> intron   | 147650       |
| GBT298       | <i>zgc:194659</i> | NA                    | 1 <sup>st</sup> intron    | NA           |
| GBT270       | <i>zpfm2a</i>     | ZFPM2                 | 2 <sup>nd</sup> intron*   | 603693       |
| GBT299       | <i>dph1</i>       | DPH1                  | 1 <sup>st</sup> intron    | 603527       |
| GBT340       | <i>nfatc3</i>     | NFATC3                | 1 <sup>st</sup> intron    | 602698       |
| GBT345       | <i>amot</i>       | AMOT                  | 1 <sup>st</sup> intron    | 300410       |
| GBT360       | <i>tefm</i>       | TEFM                  | 1 <sup>st</sup> intron    | NA           |
| GBT361       | <i>abr</i>        | ABR                   | 3' UTR                    | 600365       |
| GBT364       | <i>mat2aa</i>     | MAT2A                 | 1 <sup>st</sup> intron    | 601468       |
| GBT386       | <i>babam1</i>     | BABAM1                | 2 <sup>nd</sup> intron    | 612766       |
| GBT402       | <i>scaf11</i>     | SCAF11                | 2 <sup>nd</sup> intron    | 603668       |
| GBT410       | <i>vapal</i>      | VAPA                  | 1 <sup>st</sup> intron    | 605703       |
| GBT411       | <i>dnajb6b</i>    | DNAJB6                | 6 <sup>th</sup> intron*   | 611332       |
| GBT412       | <i>xpo7</i>       | XPO7                  | 1 <sup>st</sup> intron    | 606140       |
| GBT415       | <i>arrdc1b</i>    | ARRDC1                | 1 <sup>st</sup> intron    | NA           |
| GBT416       | <i>csrnp1b</i>    | CSRNP1                | 1 <sup>st</sup> intron*   | 606458       |
| GBT419       | <i>rxraa</i>      | RXRA                  | 1 <sup>st</sup> intron*   | 180245       |
| GBT422       | <i>insrb</i>      | INSR                  | 6 <sup>th</sup> intron    | 147670       |
| GBT424       | <i>v2r1</i>       | VMN2R1                | 2 <sup>nd</sup> intron    | NA           |
| GBT425       | <i>mrps18b</i>    | MRPS18B               | 5 <sup>th</sup> intron    | 611982       |
| GBT503       | <i>stat1a</i>     | STAT1                 | 6 <sup>th</sup> intron*   | 600555       |
| GBT513       | <i>map2k6</i>     | MAP2K6                | 1 <sup>st</sup> intron    | 601254       |
| GBT589       | <i>oxsr1b</i>     | OXSR1                 | 3 <sup>rd</sup> intron    | 604046       |

OMIM, Online Mendelian Inheritance in Man; NA, not available

**Table 2.** ECG quantification to validate 3 GBT lines as SA mutants in homozygous fish

| <b>Genotype</b>             | <b>Age</b> | <b>N</b> | <b>SA incidence (%)</b> | <b>SA Frequency (epm)</b> | <b>Heart rate (bpm)</b> |
|-----------------------------|------------|----------|-------------------------|---------------------------|-------------------------|
| WT                          | 16 m       | 20       | 5.0                     | 2.0                       | 100.1±11.1              |
| <i>GBT103<sup>-/-</sup></i> | 16 m       | 7        | 57.1*                   | 3.4±2.9                   | 89.1±18.8               |
| <i>GBT410<sup>-/-</sup></i> | 16 m       | 9        | 44.4*                   | 1.4±0.6                   | 99.9±17.7               |
| <i>GBT411<sup>-/-</sup></i> | 16 m       | 10       | 40.0*                   | 3.0±1.0                   | 90.6±7.5*               |

SA, sinus arrest. bpm, beats per minute. N=7-20. \*,  $P < 0.05$ , data are expressed as mean±SEM. For SA incidence comparison, Chi-square test. For heart rate comparison, unpaired student's *t*-test.

**Table 3.** Echocardiography indices in the *Dnajb6*<sup>+/-</sup> heterozygous mice compared to WT controls at 1 year

|                 | WT         | <i>Dnajb6</i> <sup>+/-</sup> | <i>P</i> value |
|-----------------|------------|------------------------------|----------------|
| Mice number (n) | 6          | 6                            |                |
| HR (bpm)        | 481±16     | 447±11                       | 0.0017         |
| IVSd (mm)       | 0.73±0.08  | 0.80±0.06                    | 0.0895         |
| LVIDd (mm)      | 3.92±0.33  | 3.71±0.18                    | 0.2022         |
| LVPWd (mm)      | 0.80±0.05  | 0.81±0.03                    | 0.5204         |
| IVSs (mm)       | 1.10±0.07  | 1.11±0.08                    | 0.7878         |
| LVIDs (mm)      | 2.95±0.26  | 2.77±0.15                    | 0.1821         |
| LVPWs (mm)      | 1.11±0.06  | 1.21±0.12                    | 0.1000         |
| LVEF (% Cube)   | 57.17±5.95 | 58.17±3.92                   | 0.7380         |
| LVEF (% Teich)  | 55.50±5.82 | 56.67±4.23                   | 0.6996         |
| LVFS (%)        | 24.67±3.61 | 25.17±2.32                   | 0.7813         |
| LVd Mass (g)    | 0.69±0.01  | 0.68±0.01                    | 0.7650         |
| LVs Mass (g)    | 0.69±0.01  | 0.69±0.01                    | 1.0000         |

HR, heart rate; bpm, beats per minute; IVSd, Interventricular septum thickness at end-diastole; LVIDd, left ventricular internal dimension at end-diastole; LVPWd, left ventricular internal dimension at end-diastole; IVSs, Interventricular septum thickness at end-systole; LVIDs, Left ventricular internal dimension at end-systole; LVPWs, Left ventricular posterior wall thickness at end-diastole; LVEF, left ventricular ejection fraction; LVFS, left ventricular fractional shortening; LVd, left ventricular at end-diastole; LVs, left ventricular at end-systole. Unpaired 2-tailed student's *t*-test.



**Table 4.** ECG quantification of *Dnajb6* heterozygous mice at 6 months of age

| <b>Genotype</b>              | <b>Age</b> | <b>N</b> | <b>SA incidence (%)</b> | <b>AVB incidence (%)</b> | <b>Heart rate (bpm)</b> |
|------------------------------|------------|----------|-------------------------|--------------------------|-------------------------|
| WT                           | 6 m        | 20       | 5.0                     | 0                        | 516.3±34.3              |
| <i>Dnajb6</i> <sup>+/-</sup> | 6 m        | 44       | 34.1*                   | 6.8                      | 494.8±38.3*             |

SA, sinus arrest. bpm, beats per minute. N=20-44. \*,  $P < 0.05$ , data are expressed as mean±SEM. For SA incidence comparison, Chi-square test. For heart rate comparison, unpaired student's *t*-test.
